# Supplementary material for: Assimilation of river discharge in a land surface model to improve estimates of the continental water cycles
Source: Copernicus journal article supplement (doi:10.5194/hess-2017-731), 2018-01-08
Supplement: Supplementary file [file hess-2017-731-AC3-supplement.pdf]

## Response to Comments from Anonymous Reviewer #2

We thank reviewer #2 for the comments. The reviewer's comments are in *italic* below. The added/modified parts are highlighted in blue, both below and in revised manuscript. The revised marked-up manuscript (text and figures) is attached after the responses to reviewer #2's comments.

*Reviewer #2: Interactive comment on "Assimilation of river discharge in a land surface model to improve estimates of the continental water cycles" by Fuxing Wang et al.*

The manuscript presents a calibration methodology to optimize a multiplicative factor on modeled surface runoff and deep drainage using river discharge observations. The study focus over Iberia using the ORCHIDEE land surface model, incorporating a river routing scheme and benefiting from the ORCHIDEE data assimilation system. This study is of general interest for the land surface and large-scale hydrological communities presenting a novel optimization/calibration methodology. The manuscript is well presented and organized, but there are a few points that require further attention before publication.

### Comments:

1. "Data assimilation": Data assimilation is normally associated with an "update" of the model state, e.g., via improved initial condition. In this study, merging modelled river discharge with observations is used to "obtain optimized discharge over the entire basin" (as mentioned in the abstract). Therefore I felt that the term "data assimilation" could be a bit misleading for the audience, since this manuscript shows a model optimization or calibration. I suggest that the authors make this point very clear to avoid confusion.

**Answer:** The data assimilation could be applied for different cases: (1) to correct initial condition (correcting state variable) which is mostly used for numerical weather prediction; (2) to correct the state variable during the data assimilation period (i.e., in this case both the trajectory of the model and the initial conditions are corrected); (3) to correct the parameter of a model. These different usages can be mixed. In the current study, the data assimilation refers to the 3<sup>rd</sup> case which is mainly used in ORCHIDEE data assimilation and in other land surface models.

We find similar descriptions of data assimilation in several papers. For example, Reichle (2008) mentioned that 'All data assimilation methods share the basic tenet of merging models and observations, yet the sophistication of the merging algorithm varies widely. Important differences also remain between the specific methods that are most suitable for a given application. Since atmospheric and oceanic dynamics are chaotic (that is, small errors in the initial condition can lead to large

differences at later times in the model integration), data assimilation in these areas is very much concerned with the estimation of initial conditions. By contrast, land surface dynamics are damped, and land surface assimilation is all about estimating errors in uncertain meteorological forcing (boundary) conditions and model parameterizations. Clearly, “one size does not fit all” in data assimilation’. Smith et al. (2013) explained that ‘It is most commonly used to produce initial conditions for state estimation: estimating model variables whilst keeping the model parameters fixed. However, it is also possible to use data assimilation to provide estimates of uncertain model parameters.’ Raoult et al. (2016) also wrote that ‘Optimisation techniques come under the umbrella of model–data fusion and range from simple ad hoc parameter tuning to rigorous data assimilation frameworks. These approaches have been used in a number of studies, covering various LSMs, to derive vectors of parameters that improve model–data fit significantly.’

For this reason, the expression of ‘data assimilation’ is kept in the paper, but a clarification is given at **Lines 91-97**: *The data assimilation, a specific type of inverse problem, is generally applied for different cases: (1) to correct initial condition (correcting state variable) which is mostly used for numerical weather prediction; (2) to correct the state variable during the data assimilation period (i.e., in this case both the trajectory of the model and the initial conditions are corrected); and (3) to correct the parameter of a model. In the current study, the data assimilation refers to the 3<sup>rd</sup> case.*

#### **References:**

- Raoult, N. M., Jupp, T. E., Cox, P. M., and Luke, C. M.: Land-surface parameter optimisation using data assimilation techniques: the adJULES system V1.0, *Geosci. Model Dev.*, 9, 2833-2852, <https://doi.org/10.5194/gmd-9-2833-2016>, 2016.
- Reichle, R. H.: Data assimilation methods in the Earth sciences, *Adv. Water Resour.*, 31, 1411–1418, [doi:10.1016/j.advwatres.2008.01.001](https://doi.org/10.1016/j.advwatres.2008.01.001), 2008.
- Smith PJ, Thornhill GD, Dance SL, Lawless AS, Mason DC, Nichols NK. 2013. Data assimilation for state and parameter estimation: application to morphodynamic modelling. *Q. J. R. Meteorol. Soc.* 139: 314–327. [doi:10.1002/qj.1944](https://doi.org/10.1002/qj.1944)

2. River routing model: Since both references of the routing model are not published yet (Nguyen-Quang et al., 2017; Zhou et al., 2017) and this is a key component of this study it is important to have a bit more details on how the three linear reservoir are represented and which model parameters are used and were defined (e.g., water residence time). For example the aquifer level is referred later in the text due to spin-up, but it is not clear from the model description how the aquifers are represented in the model.

**Answer:** More descriptions for the three linear reservoir and the water residence time are added at **Lines 212-219**: ‘In each HTU, the water is routed through a cascade of three linear reservoirs

characterized by their residence times: the groundwater, overland and stream reservoirs. The runoff and drainage are the inputs into the overland reservoir and groundwater reservoir, then they flowed into the stream reservoir of the downstream sub-grid basin. The residence times are determined by multiplying a constant reservoir factor ( $g$ ) with a slope index ( $k$ ). The  $g$  for stream, overland and groundwater reservoirs are 0.24, 3, and 25 day/km, respectively (Ngo-Duc et al., 2007). The slope index is a function of distance ( $d$ ) and slope ( $S$ ) between a pixel and its downstream pixel ( $k=d/S^{1/2}$  defined by Ducharne et al., 2003).'

At **Lines 221-224**: 'The river discharge is linear with  $R$  and  $D$  at annual scale over a small basin. In case of more than one observation stations are assimilated in a river basin (e.g.,  $x_1$  and  $x_2$  in Fig. 1a), the river discharge at downstream is affected by the discharge of upstream thus it is not a linear system anymore. Therefore, the optimization is needed to deal with the  $x$  over the non-linear sub-basins'

At **Lines 135-136**: 'The  $W$  and  $A$  terms refer to water storage and water stored in the aquifers, respectively.'

The description of aquifers are added at **Lines 196-198**: 'In other words, the ORCHIDEE LSM assumes that the aquifer level is below the model bottom, and it neglects the upward water flow through capillary forces from its underlying aquifer.'

The two papers are available on line now at: <https://www.geosci-model-dev-discuss.net/gmd-2018-57/> and <https://www.hydrol-earth-syst-sci-discuss.net/hess-2018-88/> . The citation of the two papers has been updated at **Line 204** (Nguyen-Quang et al., 2018; Zhou et al., 2018). The reference lists are adjusted at **Lines 765-768** and **Lines 853-856**.

Nguyen-Quang, T., Polcher, J., Ducharne, A., Arsouze, T., Zhou, X., Schneider, A., and Fita, L.: ORCHIDEE-ROUTING: A new river routing scheme using a high resolution hydrological database, Geosci. Model Dev. Discuss., <https://doi.org/10.5194/gmd-2018-57>, in review, 2018.

Zhou, X., Polcher, J., Yang, T., Hirabayashi, Y., and Nguyen-Quang, T.: Understanding the water cycle over the upper Tarim basin: retrospect the estimated discharge bias to atmospheric variables and model structure, Hydrol. Earth Syst. Sci. Discuss., <https://doi.org/10.5194/hess-2018-88>, in review, 2018.

**3.** How does the simple estimate of the correction factor used as prior (" $x_{prior}$ ") compares with optimized values in figure 6? Are the changes significant for example in terms of improved correlation?

**Answer:** For easier understanding, the methods of ' $x_{prior} = 1$ ' and ' $x_{prior} =$  pre-estimated-prior' are named as  $x_{prior\_1}$  and  $x_{prior\_ref}$ , respectively (**Section 2.4 and Fig. 3**).

The  $x_{prior\_ref}$  is compared with optimized correction factor in Fig. R1 below. The  $x_{prior\_ref}$  captures the general distribution pattern of optimal  $x$ , but the correlation coefficient of using  $x_{prior\_ref}$  is lower than that of using optimal  $x$ . In other words, the assimilated river discharge is improved through both

choosing  $x_{prior\_ref}$  and optimization. The role of optimization is to find an appropriate correction factor when there are several basins (with observations) overlaps at upstream.

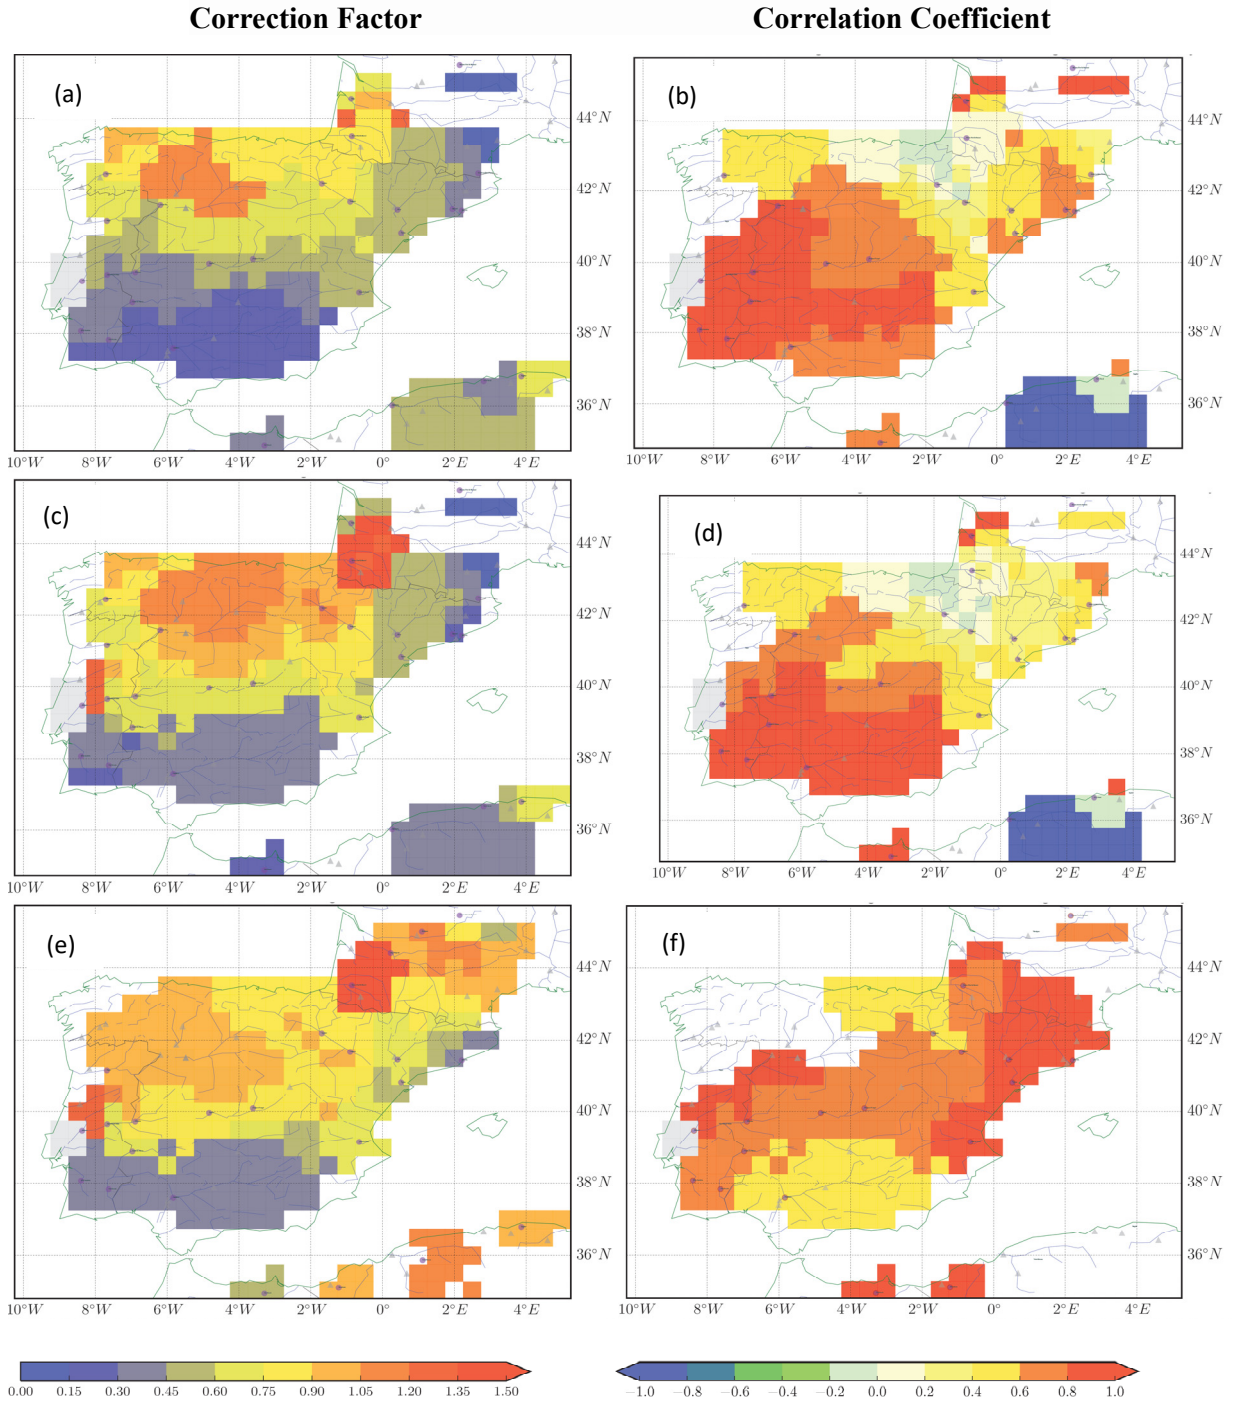

**Figure R1.** The  $x_{prior\_ref}$  (left) and the correlation coefficient (right) of river discharge between observations and simulations from 1980 to 1989 for WFDEI\_GPCC (1st row), WFDEI\_CRU (2nd row) and CRU\_NCEP (3rd row) forcing.

Explanations were added in **Lines 397-401**: ‘It should be mentioned that the  $x_{prior\_ref}$  is able to capture the general distribution pattern of optimal  $x$ , but the performance of river discharge estimation is significantly improved through optimization. The role of optimization is to find an appropriate correction factor when there are several basins (with observations) overlaps at upstream’.

**4. Role of forcing:** To discard the role of precipitation forcing, the three datasets could be compared with a high resolution precipitation dataset (IB02, Belo-Pereira et al. 2011) also in terms of mean ratios: GPCC/IB02 CRU/IB02 NCEP/IB02 and compared with the “ $x$ ” correction factor. I don’t see this as mandatory for the paper’s publication, but would make the results more robust.

Belo-Pereira M, Dutra E, Viterbo P. Evaluation of global precipitation data sets over the Iberian Peninsula. *Journal of Geophysical Research-Earth Surface*. 2011. 116: D20101. doi:10.1029/2010jd015481.

**Answer:** The precipitation of WFDEI\_GPCC, WFDEI\_CRU, and CRU\_NCEP is compared with the IB02 precipitation data. The precipitation of the three forcing are higher than IB02 over most regions (Figs. R2a-R2c) but their spatial distributions are different with the proposed evaporation correction (Figs. 9e-9g). The ratios of WFDEI\_GPCC/IB02, WFDEI\_CRU/IB02 CRU\_NCEP/IB02 are generally higher than 1 with few grid cells of ratios lower than 1 being distributed randomly (Figs. R2d-R2f). The pattern of the three ratios is not consistent with the optimized correction factor (Figs. 8a-8c), which indicates that the precipitation forcing error is not likely the dominant factor of the correction factor distribution.

These analysis are added in the revised manuscript (**Lines 452-459**): ‘This is also demonstrated by comparing the precipitations between the three forcing and IB02 dataset. Compared to IB02, all the three forcing overestimate rainfall in the Iberian Peninsula (Figs. S1a-S1c), but none of these error patterns resembles that of the proposed  $E$  correction (Figs. 9e-9g). Unlike the pattern of the correction factor (Figs. 8a-8c), the ratios of annual mean precipitation between the three forcing and IB02 are higher than 1 over most regions (Figs. S1d-S1f). Therefore, the precipitation forcing error is not likely the dominant factor in determining the correction factor distribution.’

The IB02 dataset is described at **Lines 254-257**: ‘The precipitation of the three forcing is compared with IB02 dataset which is a gridded daily rainfall dataset for Iberia Peninsula with  $0.2^\circ$  resolution covers 1950 to 2003 (Belo-Pereira et al., 2011). It is generated by using ordinary kriging from more than 2400 quality-controlled stations.’

The reference was added at **Lines 650-652**. The Figs. R2d-R2f below were added in the ‘Supplementary’ of the manuscript (Fig. S1).

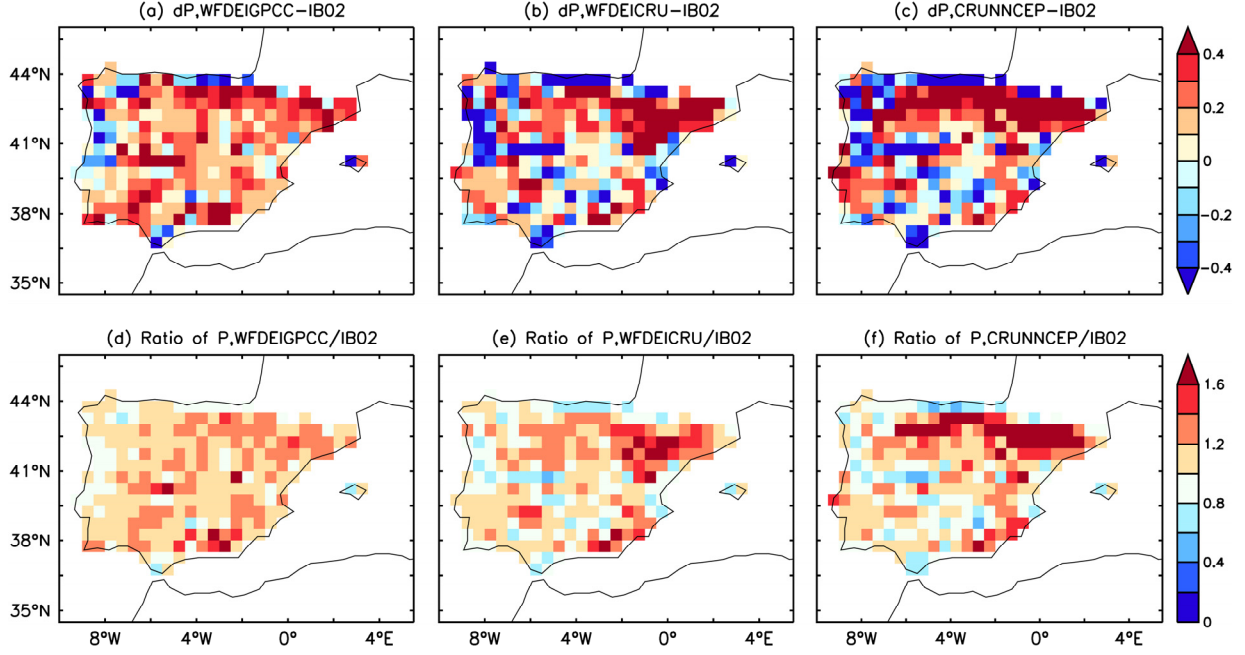

**Figure R2.** Comparison of precipitation ( $P$ , in mm/d) between IB02 and that used in the assimilation (a and d: WFDEI-GPCC; b and e: WFDEI-CRU; c and f: CRUNNCEP) averaged from 1980 to 1989: 1<sup>st</sup> row for difference; 2<sup>nd</sup> row for ratio.

5. Impact on evaporation: Section 3.4 compares the first guess evaporation by the land-surface model with the changes in evaporation resulting for the correction as a post-processing. Would it be possible to re-run the LSM applying just a constant correction factor to evaporation ? I understand that this might be difficult to do while conserving energy, but even if energy is not conserved, it could show the impact of “improving” evaporation, that would then be reflected directly in R & D and should, in principle improve the discharge simulations.

**Answer:** We tested the possibility of improving river discharge by using a constant correction factor to evaporation. Theoretically, the modification of evaporation leads to a change in soil moisture thus surface runoff and deep drainage are changed. From Eq. (6), the correction factor for  $E$  ( $X_{Ecorr}$ ) can be derived from  $x$  by Eq. (R1). The  $X_{Ecorr}$  is then applied to correct  $E$  (Eq. R2). Like the correction factor  $x$ , the  $X_{Ecorr}$  changes with year.

$$X_{Ecorr} \approx \frac{E + (1 - x) \cdot (R + D)}{E}, \quad (R1)$$

$$E_{corr} = X_{Ecorr} \cdot E \quad (R2)$$

The Eqs. R1 and R2 were implemented in ORCHIDEE LSM and the LSM was running over 1980-1984. The Fig. R3 shows the BIAS of river discharge after correcting evaporation in ORCHIDEE

LSM. The absolute BIAS is reduced comparing with the reference run (forced by WFDEI\_GPCC without correcting evaporation).

The BIAS becomes negative after correcting evaporation, which is probably because the evaporation correction factor  $X_{Ecorr}$  is greater than 1 over most cases, and it leads to a decrease in R+D with time evolution. Unlike the correction of runoff and drainage by using a constant factor (change with year) in current study, the correction of evaporation leads to a feedback on soil moisture which in turn affects the evaporation simulation. Therefore, both energy and water balance are not conserved in this case. Another solution of improving river discharge simulation by correcting evaporation could be to run the full ORCHIDEE LSM in the assimilation system with the same cost function as Eq. (7) in the manuscript. In this way, the intermediate variables are adjusted towards optimal river discharge with the modification of evaporation. Because the optimization by running the full ORCHIDEE model is very time consuming, this is not done in this paper but could be one of the future work.

The explanations were added in the revised manuscript (**Line 487-496**): ‘We also tested the possibility of improving the river discharge estimation by using a constant correction factor to evaporation ( $X_{Ecorr}$ ). The  $X_{Ecorr}$  (different for each year) can be derived from Eq. (6).

$$X_{Ecorr} \approx \frac{E + (1 - x) \cdot (R + D)}{E}, \quad (11)$$

$$E_{corr} = X_{Ecorr} \cdot E \quad (12)$$

Although the Eqs. 11-12 are able to improve river discharge estimation by modifying soil moisture, the energy and water balance are not conserved. One solution could be to run the full ORCHIDEE LSM in the assimilation system with the same cost function as Eq. (7). In this way, the intermediate variables are adjusted towards optimal river discharge with the modification of evaporation. This approach executes the full ORCHIDEE model thus is very time consuming and is beyond the scope of the current study.’

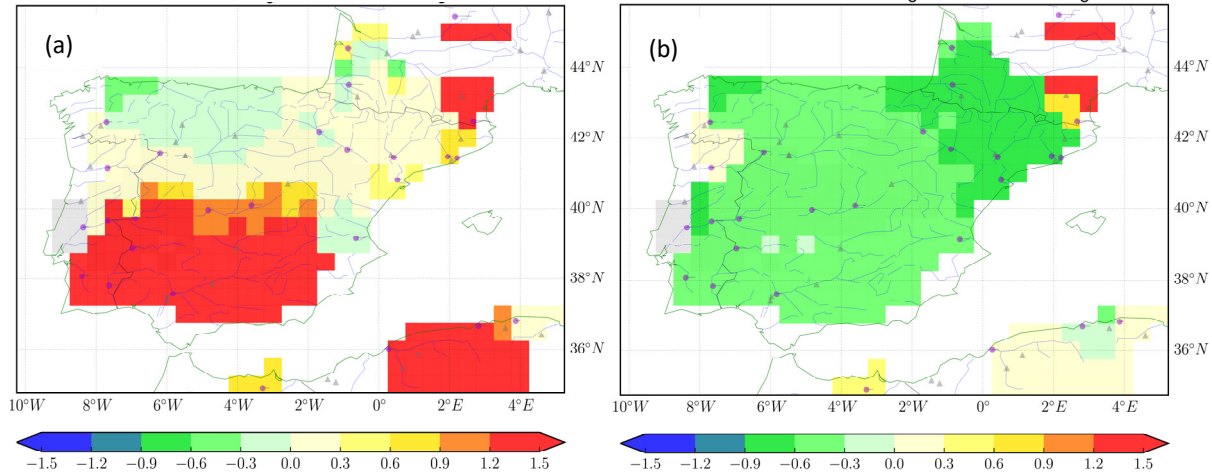

**Figure R3.** The BIAS of simulated river discharge before (left) and after (right) correcting evaporation in LSM by correction factor from 1980 to 1984.

6. Comparison with GLEAM: It would be beneficial to also present the comparison between the original Evaporation and GLEAM in addition to the results in Fig. 12 (could be an extra panel). Considering the results shown, I find it difficult to understand the sentence “In 473: “This result further confirms that ..... And some processes are probably missing in GREAM v3.1”. Please expand on this discussion to clarify the basis for this assumption.

**Answer:** The comparison between the original Evaporation and GLEAM is shown in Fig. S4 below (and **Figs. 12a-12d** in the revised manuscript).

The explanations have been added at **Lines 551-554**: ‘We find large difference between GLEAM and FG, which indicates that the evaporation is quite uncertain for different estimations. The geographical distribution and magnitude of difference in  $E$  between GLEAM and FG is highly consistent with that between GLEAM and bias corrected values by using different forcing (Figs. 12a-12c, and 12e-12g).’

The sentences have been revised at **Lines 558-561** to avoid confusion: ‘Because the bias corrected  $P-E$  are corrected by GRDC observed river discharge, the  $P-E$  ( $\approx$ river discharge) of GLEAM is very likely to be higher than GRDC observations over the Iberia. This result indicates that some processes are probably also missing in GLEAM v3.1.’



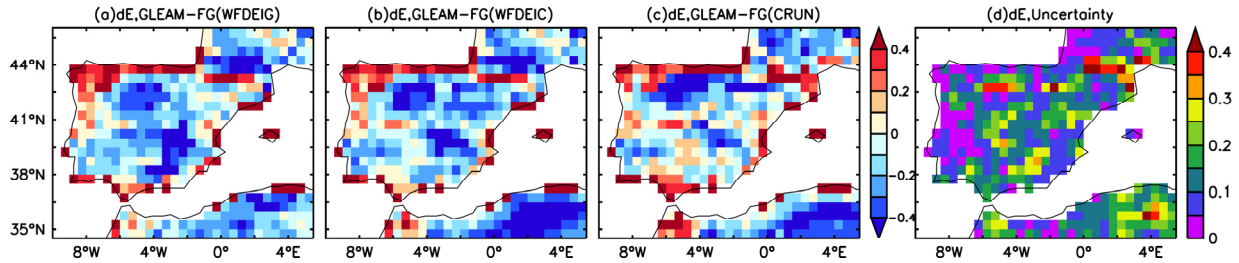

**Figure R4.** Comparison of evaporation ( $E$ , in mm/d) between GLEAM (v3.1) and FG values using different forcing (a: WFDEI-GPCC; b: WFDEI-CRU; c: CRUNCEP; d: uncertainty of using different forcing) averaged from 1980 to 1989.

**Details:**

1. Ln 21: “earth’s water cycle”

**Answer:** Revised (**Line 21**).

2. Ln 324: The relative bias shown in figure 5 highlight the biases in the South since the absolute values are low. The absolute biases might be higher in the northern areas.

**Answer:** Fig. R5 below plots the absolute bias over 1980-1989 by three different forcing. The high values of absolute bias are distributed in both northern and southern areas, and its spatial distribution is different for different forcing. To avoid confusion, the BIAS is named normalized bias (*Norm\_BIAS*) in the revised manuscript.

The explanations have been added at **Lines 369-371**: ‘The spatial pattern of the absolute bias in river discharge varies with the atmospheric forcing (not shown). The normalized bias is then applied to measure the river discharge simulation.

The expression was also revised at **Line 374**: ‘The *Norm\_BIAS* is small (within +/- 0.3) over north, west and southeast of the region (Figs. 5b, 5d and 5f)’.

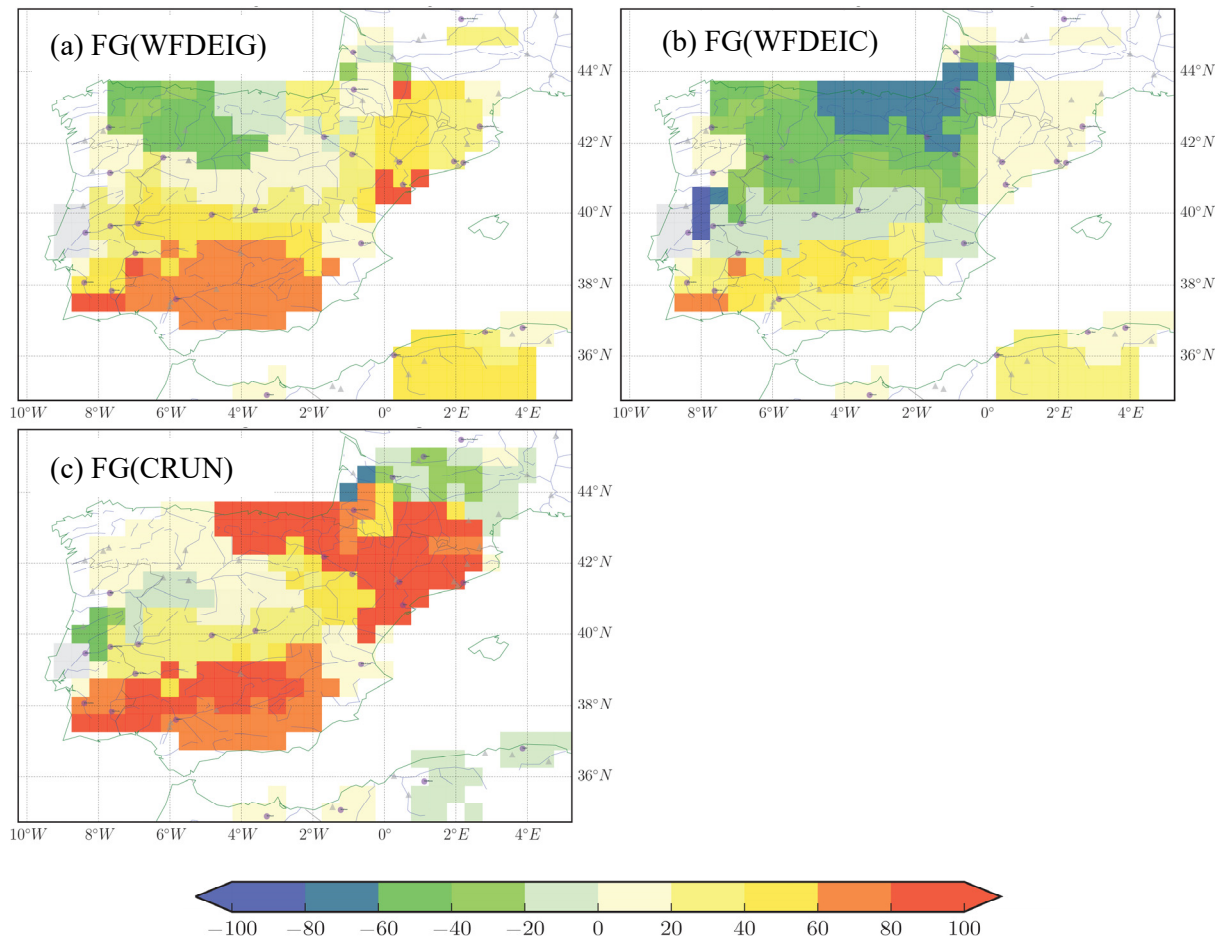

**Figure R5.** The absolute bias ( $\text{m}^3/\text{s}$ ) of river discharge simulations from 1980 to 1989 using WFDEI\_GPCC (a), WFDEI\_CRU (b) and CRU\_NCEP (c) forcing.

3. Ln 351: Should be: “Fig. 7 shows the annual mean” and not “annual cycle”

**Answer:** Revised to ‘annual mean’ (**Line 407**).

4. Ln 357: Looking that the stations distribution in Figure 2, the station Alcala Del Rio looks very close to Cantillana. If this is the case, the good results in Alcala Del Rio might be just a direct effect of the use of Cantillana observations, and it does not “validate the hypothesis that  $x$  is distributed homogeneously over the upstream basin”. Please provide the distance between the stations and difference in upstream area and mean  $Q_{obs}$  to show that Alcala Del Rio has other tributaries than just Cantillana to justify this sentence.

**Answer:** Based on GRDC observations, the distance and the difference in upstream area between Alcala Del Rio and Cantillana stations are 15.3 km and 2124  $\text{km}^2$  (46995  $\text{km}^2$  and 44871  $\text{km}^2$ , respectively). Between the two stations, there are several tributaries flow to Alcala Del Rio station, which leads to different annual mean river discharges at Cantillana (49.7  $\text{m}^3/\text{y}$ ) and Alcala Del Rio

stations (94.8 m<sup>3</sup>/y). This result illustrates that this approach is able to correct the river discharge over the entire basin. The above numbers and expressions were provided in the revised manuscript at **Lines 409-416**: ‘The observation of this station is not assimilated due to its large upstream area difference (15.53%>10%) between model (55635 km<sup>2</sup>) and GRDC (46995 km<sup>2</sup>). The overestimated discharge simulated by the model at this station is also corrected because it benefits from the correction factor estimated at the Cantillana station (-5.83°W, 37.59°N; 44871 km<sup>2</sup>) which locates at the 15.3 km upstream of Alcala Del Rio station of the Guadalquivir River (southwest of the Iberian Peninsula). Between the two stations, there are several tributaries flow to Alcala Del Rio station, which leads to different annual mean river discharges at Cantillana (49.7 m<sup>3</sup>/y) and Alcala Del Rio stations (94.8 m<sup>3</sup>/y). This result illustrates that this approach is able to correct the river discharge over the entire basin.’

5. Ln 429: It is not clear that the simulations “underestimate the inter-annual variability”. Could you provide the standard-deviation of the annual means of the observations and simulations?

**Answer:** The standard-deviations of the annual means for the FG(WFDEIG) and FG(WFDEIC) are 28.8 m<sup>3</sup>/s and 25.2 m<sup>3</sup>/s, respectively. They are lower than observation (33.8 m<sup>3</sup>/s). The values are provided at **Line 506-509**: “... while the FG(WFDEIG) and FG(WFDEIC) underestimate the inter-annual variability comparing with observations (Fig. 10a-10b). The standard-deviation of the annual means for observation, FG(WFDEIG), FG(WFDEIC) and FG(CRUN) are 33.8 m<sup>3</sup>/s, 28.8 m<sup>3</sup>/s, 25.2 m<sup>3</sup>/s and 34.3 m<sup>3</sup>/s, respectively.”

6. Ln 436 (results in Fig. 10): If we assume that the increase in discharge is due to an increase of groundwater abstraction should we expect decrease of the correction factor since this is a process which is not represented in the model? The opposite sign with an increase of the correction factor, with higher corrections in 1980 (around 0.2) and lower in 1989 (around 0.6) suggests that the correction factor is correcting for other processes and not human intervention? I think this is worth some discussion.

**Answer:** The following sentences and references were removed to avoid confusion: “The groundwater usage occupies about 90%, 16% and 44% in upper, middle and lower Guadiana river basin (Aldaya and Llamas, 2008). The groundwater abstraction increases (irrigation intensifies) during this period (Llamas and Garrido, 2007), which causes a reduction in soil water storage capacity and an increase in river discharge (Valverde et al., 2015)”.

Llamas, M. R. and Garrido, A.: Lessons from intensive groundwater use in Spain: Economic and social benefits and conflicts, In: Giordano M, Villholth KG (eds) The agricultural groundwater revolution: Opportunities and threats to development, Chapter 13. CABI International,

Oxfordshire, 266–295, 2007.

Valverde, P., Serralheiro, R., de Carvalho, M., Maia, R., Oliveira, B., and Ramos, V.: Climate change impacts on irrigated agriculture in the Guadiana river basin (Portugal), *Agric Water Manag*, 152:17–30, doi:10.1016/j.agwat.2014.12.012, 2015.

New discussions (including a reference) and a new reference were added at **Lines 511-515** and **Lines 835-837**: ‘Besides, there are many interconnected wetlands and structurally complex hydrogeological boundaries between the two upper-Guadiana aquifer in the upper Guadiana River basin (Van Loon and Van Lanen, 2013). These complex features are difficult to represent in model thus large bias exist in river discharge of ORCHIDEE. The correction factor corrects these model defects (Fig. 10c) and it demonstrates good skill in correcting the inter-annual variability of discharge and runoff coefficient (Fig. 10a-10b).’

Van Loon, A. F. and Van Lanen H. A. J.: Making the distinction between water scarcity and drought using an observation-modeling framework, *Water Resour Res*, 49, doi:10.1002/wrcr.20147, 2013.

1 **Assimilation of river discharge in a land surface model to**  
2 **improve estimates of the continental water cycles**

3  
4 Fuxing WANG<sup>1</sup>, Jan POLCHER<sup>1</sup>, Philippe PEYLIN<sup>2</sup>, and Vladislav BASTRIKOV<sup>2</sup>

5  
6 <sup>1</sup>Laboratoire de Météorologie Dynamique, IPSL, CNRS, Ecole Polytechnique, 91128, Palaiseau,  
7 France

8 <sup>2</sup>Laboratoire des sciences du climat et de l'environnement, IPSL, CEA, Orme des Merisiers,  
9 91191, Gif sur Yvette, France

10  
11  
12 Manuscript revised on May 20, 2018

13 To be submitted to *Hydrology and Earth System Sciences (HESS)*

14  
15 \*Correspondence to:

16 Fuxing Wang

17 Email: [fuxing.wang@lmd.jussieu.fr](mailto:fuxing.wang@lmd.jussieu.fr)

18 Tel: 0033 (0)1 69 33 51 80

19

20 **Abstract:**

21 The river discharge plays an important role in earth's [water cycle](#), but it is difficult to  
22 estimate due to un-gauged rivers, human activities, and measurement errors. One approach is based  
23 on the observed flux and a simple annual water balance model (ignoring human processes) for  
24 ungauged rivers, but it only provides annual mean values which is insufficient for oceanic  
25 modellings. Another way is by forcing a land surface model (LSM) with atmospheric conditions.  
26 It provides daily values but with uncertainties associated to models.

27 We use data assimilation techniques by merging the modelled river discharges by  
28 ORCHIDEE (without human processes currently) LSM and the observations from Global Runoff  
29 Data Center (GRDC) to obtain optimized discharges over the entire basin. The 'model systematic  
30 errors' and 'human impacts' (e.g., dam operation, irrigation, etc.) are taken into account by an  
31 optimization parameter  $x$  (with annual variation), which is applied to correct model intermediate  
32 variables runoff and drainage over each sub-watershed. The method is illustrated over [the](#) Iberian  
33 Peninsula with 27 GRDC stations over the period 1979-1989. ORCHIDEE represents a realistic  
34 discharge over north of [the](#) Iberian Peninsula with small model systematic errors, while the model  
35 overestimates discharges by 30%-150% over south and northeast region where the blue water  
36 footprint is large. The [normalized](#) bias has been significantly reduced to less than 30% after  
37 assimilation, and the assimilation result is not sensitive to assimilation strategies. This method also  
38 corrects the discharge bias for the basins without observations assimilated by extrapolating the  
39 correction from adjacent basins. The 'correction' increases the inter-annual variability of river  
40 discharge because of the fluctuation of water usage. The  $E$  ( $P-E$ ) of GLEAM (Global Land  
41 Evaporation Amsterdam Model, v3.1a) is lower (higher) than the bias corrected value, which could  
42 be due to the different  $P$  forcing and probably the missing processes in the GLEAM model.

43 Key words: river discharge; data assimilation; human processes; water cycle; land surface model;  
44 the Mediterranean

45

## 46 1. Introduction

47 The river discharge is an essential component of the earth's water cycles, which can be  
48 used as an indicator of the hydrological cycle intensification (Munier et al., 2012). It is important  
49 not only for water resources management, climate studies, ecosystem health over land (Syed et al.,  
50 2010; Sichangi et al, 2016), but also for providing freshwater inflow to ocean (Dai and Trenberth,  
51 2002). The freshwater flux at the sea surface has significant influence on the climate system (e.g.,  
52 ENSO, ocean dynamics) and on ocean salinity (Kang et al., 2017). The fresh water inputs for ocean  
53 model usually requires high frequency data (e.g., daily or 10-daily, Scherbakov and Malakhova  
54 2011). Besides, as the ocean model with high spatial resolution (e.g., < 10 km) demonstrates better  
55 skills than coarse resolution model (Bricheno et al., 2014; Wang et al., 2017), there is also a  
56 requirement of high resolution fresh water fluxes. [Although great efforts have been made for  
57 gridded river discharge data at global scale \(e.g., RivDIS v1.1, Vorosmarty et al., 1998; Dai and  
58 Trenberth, 2002; Fekete et al., 2002\), these data are usually at monthly or annual scales and have  
59 not been updated with time.](#) Therefore, it is of great interest to estimate large scale river discharge  
60 over the long-term at high temporal and spatial resolution and low uncertainty.

61 Estimating the river discharge input to ocean is a difficult endeavor for several reasons.  
62 First, there are many un-gauged rivers that are difficult to evaluate. Second, most large rivers are  
63 gauged by national agencies, and these data are difficult to access for public users. Besides, the  
64 number of operational gauging stations is decreasing worldwide (Syed et al., 2010; Sichangi et al,  
65 2016). Third, even though the observations are available, the observed river flow at the outlet is  
66 not well known because it is difficult to get gauging stations close to the river mouth and many  
67 observations are affected by human activities especially in semi-arid regions (Jordà et al., 2017).

68 One approach to estimate the freshwater inflow into ocean is based on the observed water  
69 fluxes over data-rich regions and a simple annual water balance model, precipitation inputs minus  
70 the evaporation, which ignoring human usage and other processes over ungauged basins (e.g.,  
71 Szczypta et al. 2012; Peucker-Ehrenbrink, 2009; Mariotti et al., 2002; Struglia et al. 2004; Boukthir  
72 and Barnier, 2000; Ludwig et al., 2009). This method is the basis of most water balance studies  
73 and oceanic modelling activities but it has several limitations. First, there are uncertainties in  
74 observations related to measurement method and post-processing method. These uncertainties are

75 difficult to quantify due to the incomplete information (Jordà et al., 2017). Second, only annual  
76 mean values are available over un-gauged basins (about 40% for the Mediterranean; 42% over  
77 globe excluding Greenland and Antarctica, Clark et al., 2015) by simple runoff models, which are  
78 not sufficient for oceanic modellings.

79 Riverine input can also be obtained through forcing a state of the art land surface model  
80 (LSM) or global hydrological model (GHM) with bias corrected atmospheric conditions (e.g., aus  
81 der Beek et al., 2012; Bouraoui et al. 2010; Jin et al., 2010; Sevault et al., 2014). These numerical  
82 models can estimate river discharge at higher frequency and over more un-gauged basins (Jordà et  
83 al., 2017), but they are associated with modelling uncertainties. First, models are designed and  
84 have proved the ability to capture the natural water cycles, but relatively less progress has been  
85 made in parameterizing human processes (Pokhrel et al., 2017). The water flow of many  
86 catchments has been strongly regulated by human through irrigation use, dam operation, etc. (e.g.,  
87 the southern shores of the Mediterranean). Second, there are large discrepancies among models  
88 resulting from the differences in model inputs, parameterizations, and atmospheric forcing data  
89 (Ngo-Duc et al., 2007; Wang et al., 2016; Liu et al. 2017).

90 The objective of the present study is to illustrate a novel approach based on assimilation  
91 techniques applied to LSM to estimate continental water cycles (riverine fresh water). [The data](#)  
92 [assimilation, a specific type of inverse problem, is generally applied for different cases: \(1\) to](#)  
93 [correct initial condition \(correcting state variable\) which is mostly used for numerical weather](#)  
94 [prediction; \(2\) to correct the state variable during the data assimilation period \(i.e., in this case](#)  
95 [both the trajectory of the model and the initial conditions are corrected\); and \(3\) to correct the](#)  
96 [parameter of a model. In the current study, the data assimilation refers to the 3<sup>rd</sup> case. This](#)  
97 assimilation approach merges the data from the model (ORCHIDEE LSM) and the observed river  
98 discharge from the Global Runoff Data Centre (GRDC, 56068 Koblenz, Germany). This will allow  
99 to compensate for model systematic errors or missing processes and provide estimates of the  
100 riverine input into the sea at high temporal and spatial resolution. Although previous works exist  
101 on assimilation of river discharge (e.g., Li et al., 2015; Bauer-Gottwein et al., 2015; Pauwels et al.,  
102 2009), these studies mainly focus on the stream flow prediction over individual catchments. They  
103 are difficult to extend to long-term scale and large catchment due to the observations and  
104 computing time limitations.



105 This paper focuses on the methodology and its illustration in a Mediterranean region (the  
106 Iberian Peninsula) which is considered one of the most vulnerable regions to climate change due  
107 to its geographic and socio-economic characteristics (Vargas-Amelin and Pindado, 2014).  
108 Although the amount of river discharge is relatively small (about one third to half of precipitation  
109 amount; Tixeront, 1970; Shaltout and Omstedt 2015), it is an important source of fresh water  
110 entering the Mediterranean Sea and it plays an important role in sustaining the marine productivity  
111 (Bouraoui et al., 2010) and overturning circulation (Verri et al., 2017). The river discharges to the  
112 Mediterranean Sea underwent important changes during recent decades. This variation is  
113 particularly important for this region because of its scarce water resource with increasing water  
114 demand for domestic, industrial, irrigation and tourism activities, as well as its drier and warmer  
115 conditions under climate change (Romanou et al., 2010). Considering the high stress on the water  
116 resources in the Mediterranean region, accurate estimation of the actual resources is important.

117 The methods (including the model, datasets and numerical experiment) are described in  
118 Sect. 2. The results and discussions are given in Sect. 3. Conclusions are drawn in Sect. 4.

## 119 **2. Methods**

### 120 **2.1. The theoretical background**

121 The theoretical basis of the LSM assimilation for the study is the vertical and lateral water  
122 balance. The precipitation ( $P$ ) input of a basin is transferred into either evaporation, surface runoff  
123 ( $R$ ), deep drainage ( $D$ ) (eventually the  $R$  and  $D$  reaching the channel and leaving in the form of  
124 river discharge), or stored in the ground.

$$125 \quad \frac{dW}{dt} = P - (R + D) - E, \quad (1)$$

126 Over long period, the change of water storage  $\frac{dW}{dt}$  is small ( $\frac{dW}{dt} \approx 0$ ), thus

$$127 \quad P - E \approx R + D \quad (2)$$

128 The lateral water balance over a basin (e.g., the sub-catchment 2 in blue in Fig. 1a) is given  
129 by:

130 
$$\frac{dA_2}{dt} = \left[ \int_{S_2} (R_2 + D_2) ds \right] - Q_2 + Q_1, \quad (3)$$

131 where  $S_2$  is the area of sub-catchment 2;  $A_2$  is the water stored in the aquifers of area  $S_2$ ;  $Q_2$  and  $Q_1$   
 132 are the river discharge at outlet of each sub-catchment, and they are calculated by the integral of  
 133 runoff and drainage over the sub-catchment area  $S_1$  and  $S_2$ . We assume the  $A_2$  variation at annual  
 134 scale is small ( $\frac{dA_2}{dt} \approx 0$ ) due to its slow variability, although it can be nonzero due to the human  
 135 intervention (e.g., over Indo-Gangetic Basin, MacDonald et al., 2016). [The  \$W\$  and  \$A\$  terms refer to](#)  
 136 [water storage and water stored in the aquifers, respectively](#). The Eqs. (1)-(3) describe the basic  
 137 water cycle processes in the LSMs.

138 Despite that the LSMs have developed rapidly during the last few decades, few models  
 139 take into account the human water usage processes. Due to this limitation, LSMs are usually  
 140 accompanied with errors in reproducing discharge and evaporation in areas where these processes  
 141 are dominant. Assuming the  $P$  forcing is known in LSM, the modelled water continuity imposes a  
 142 balance of errors between  $E$ ,  $R$  and  $D$ . However, the  $R$  and  $D$  are conceptual variables, and their  
 143 errors are impossible to evaluate by observations directly. The field measurements of  $E$  over large  
 144 area are also scarce due to land surface heterogeneity (Kalma et al., 2008). Fortunately, the  
 145 observations of river discharge ( $Q_{obs}$ ) are available. By fitting modelled discharge with  $Q_{obs}$ , we  
 146 can correct model intermediate variables in Eqs. (1)-(3) (e.g., correct  $R$  and  $D$  by a correction factor  
 147  $x$ , Fig. 1a) in order to get bias corrected river discharge ( $Q_{corr}$ ).

148 
$$Q_{corr} = \int_{catchment} (x \cdot R + x \cdot D) dS, \quad (4)$$

149 Recalling the  $\frac{dW}{dt}$  is small and  $P$  is known, we then transfer the  $x$  into vertical water balance  
 150 and close the horizontal water balance by the corrected evaporation ( $E_{corr}$ ):

151 
$$E_{corr} \approx P - x \cdot (R + D), \quad (5)$$

152 The impacts of assimilation on  $E$  ( $\Delta E$ ) can be derived from the optimal  $x$ ,  $R$ , and  $D$ :

153 
$$\Delta E = E_{corr} - E \approx (1 - x) \cdot (R + D), \quad (6)$$

154 The key problem remains to determine the optimal  $x$  (described in Sect. 2.2.2). Each  
 155 discharge observation station corresponds to an optimal correction factor  $x$  since the discharge is  
 156 the only representative of the integral over the basin. The total number of  $x$  depends on the number  
 157 of available stations. The optimal  $x$  over each observation station is applied to its entire upstream  
 158 area. Over each upstream area (dashed box in Fig. 1a), the optimal  $x$  of these model grid cells are  
 159 the same. The ‘ $R + D$ ’ and  $E$  are corrected at the same grid cell level by  $x$  and Eq. (5), respectively.

## 160 2.2. The models

### 161 2.2.1. Assimilation strategy and ORCHIDAS

162 The optimal  $x$  is obtained from the ORCHIDEE Data Assimilation System (ORCHIDAS,  
 163 <https://orchidas.lsce.ipsl.fr/>). It was designed to optimize the variables related to water, energy and  
 164 carbon cycles in ORCHIDEE (Organising Carbon and Hydrology in Dynamic Ecosystems;  
 165 Krinner et al. 2005; De Rosnay et al., 2002) LSM by using various observations (e.g. in situ,  
 166 satellite, etc.). The ORCHIDAS has been applied over different regions for various variables and  
 167 demonstrated good performance (Santaren et al., 2007; Kuppel et al., 2012; MacBean et al., 2015).  
 168 More details of ORCHIDAS are presented by Peylin et al. (2016).

169 In this work, the ORCHIDAS drives the ORCHIDEE routing scheme which is  
 170 computationally less expensive than the full ORCHIDEE model (Fig. 1b). The data assimilation  
 171 approach relies on the minimization of a misfit function  $J(x)$  (aka cost function) by successive calls  
 172 to “gradient-descent” minimization algorithm L-BFGS-B (Limited-memory Broyden-Fletcher-  
 173 Goldfarb-Shanno algorithm with simple Box constraints, Byrd et al., 1995).

174 A new vector of parameter values  $x$  is estimated at each iteration. The  $J(\mathbf{x})$  measures the  
 175 mismatch between the vector of observed river discharges  $Q_{obs}$  and corresponding simulated  
 176 values  $Q_{sim}(x)$ , as well as between the optimized correction factors  $x$  and its prior information  $x_{prior}$ :

$$177 \quad J(\mathbf{x}) = [\mathbf{Q}_{obs} - \mathbf{Q}_{sim}(\mathbf{x})]^t \mathbf{R}^{-1} [\mathbf{Q}_{obs} - \mathbf{Q}_{sim}(\mathbf{x})] + (\mathbf{x} - \mathbf{x}_{prior})^t \mathbf{B}^{-1} (\mathbf{x} - \mathbf{x}_{prior}), \quad (7)$$

178 where  $\mathbf{R}$  and  $\mathbf{B}$  represent the prior error covariance matrices for observations and parameters,  
 179 respectively. Diagonal elements of  $\mathbf{R}$  matrix represent the data uncertainties, which include both

180 the measurement errors (systematic and random) and model errors, we have defined it as the root  
181 mean squared error (RMSE) between the prior model simulations and the observed river  
182 discharges. Non-diagonal elements describe correlations between the data, which however are  
183 difficult to presume correctly, and are usually neglected. The prior parameter uncertainties (matrix  
184 **B**) have been set to 40% of the range of variation of correction factors obtained from the ratio  $Q_{obs}$   
185 and first guess value of river discharge simulation ( $Q_{fg}$ ) obtained from  $x_{prior}$ . The matrix **B** was  
186 determined based on the expert knowledge of ORCHIDEE model (Kuppel et al., 2012; Santaren  
187 et al., 2014). Correlations between prior parameter values have not been considered. The gradient  
188 of the  $J(x)$  is calculated for all the parameters by finite difference approach at each iteration  
189 (Kuppel et al., 2012).

### 190 2.2.2. ORCHIDEE LSM with high-resolution river routing model

191 The ORCHIDEE LSM is the land component of Institut Pierre Simon Laplace Climate  
192 Model (IPSL-CM), which simulates energy, water and carbon cycles between the soil and  
193 atmosphere. The unsaturated water flow is described at each land point by the one-dimensional  
194 Richards equation with 2 m soil discretized to 11 levels. The surface runoff and deep drainage at  
195 bottom layer are computed by Horton overland flow and free drainage (equals to hydraulic  
196 conductivity), respectively. In other words, the ORCHIDEE LSM assumes that the aquifer level  
197 is below the model bottom, and it neglects the upward water flow through capillary forces from its  
198 underlying aquifer. The evaporation is partitioned into transpiration, bare soil evaporation,  
199 interception loss and snow sublimation.

200 The ORCHIDEE is coupled with the ocean model through the river routing scheme  
201 (Polcher, 2003; Ducharne et al. 2003; Guimberteau et al., 2012) which computes river discharge  
202 by integrating the surface runoff and deep drainage over the basin. A high-resolution river routing  
203 scheme was developed recently, which allows to better describe of catchments boundaries, flow  
204 direction, and water residence time (Nguyen-Quang et al., 2018; Zhou et al., 2018). It is based on  
205 the HydroSHED (Hydrological data and maps based on SHuttle Elevation Derivatives at  
206 multiple Scales; <http://www.hydrosheds.org/>; Lehner et al., 2008) map with 1 km spatial resolution.  
207 There are several hydrological transfer units (HTUs) in one ORCHIDEE grid-cell (e.g., 100 in the  
208 current study). The HTU is constructed based on the Pfafstetter topological coding system and

209 user defined size. Each HTU represents the section of the river basin within the grid box, and many  
210 HTUs forms a river basin (Nguyen-Quang et al., 2018). Therefore, the relative locations of HTUs  
211 in each grid cell are not fixed.

212 In each HTU, the water is routed through a cascade of three linear reservoirs characterized  
213 by their residence times: the groundwater, overland and stream reservoirs. The runoff and drainage  
214 are the inputs into the overland reservoir and groundwater reservoir, then they flowed into the  
215 stream reservoir of the downstream sub-grid basin. The residence times are determined by  
216 multiplying a constant reservoir factor ( $g$ ) with a slope index ( $k$ ). The  $g$  for stream, overland and  
217 groundwater reservoirs are 0.24, 3, and 25 day/km, respectively (Ngo-Duc et al., 2007). The slope  
218 index is a function of distance ( $d$ ) and slope ( $S$ ) between a pixel and its downstream pixel ( $k=d/S^{1/2}$   
219 defined by Ducharme et al., 2003). The water can flow either to the next HTU within the same grid  
220 cell or to the neighboring cell. The river discharge is diagnosed at the HTU level in the assimilation.  
221 The river discharge is linear with  $R$  and  $D$  at annual scale over a small basin. In case of more than  
222 one observation stations are assimilated in a river basin (e.g.,  $x_1$  and  $x_2$  in Fig. 1a), the river  
223 discharge at downstream is affected by the discharge of upstream thus it is not a linear system  
224 anymore. Therefore, the optimization is needed to deal with the  $x$  over the non-linear sub-basins.

225 The time steps for the ORCHIDEE model and routing scheme are 30 minutes and 3 hours,  
226 respectively. The spatial resolution of the model depends on the resolution of the atmospheric  
227 forcing, and it is  $0.5^\circ$  for the current study (given in Sect. 2.3.2). The soil texture map is from  
228 United States Department of Agriculture (USDA) with 12 soil textures (Reynolds et al. 2000). The  
229 vegetation map is from the European Space Agency Climate Change Initiative (ESA CCI,  
230 <https://www.esa-landcover-cci.org/>) reduced to the 13 plant functional types represented by the  
231 model.

## 232 **2.3. The study domain and the datasets**

### 233 **2.3.1. Study domain**

234 The assimilation system is applied over the Iberian Peninsula. This region is dominated by  
235 two climate types: the oceanic climate in the Atlantic coastal region and the Mediterranean  
236 climate over most of Portugal and Spain. The annual precipitation is extremely unevenly

237 distributed with more than 1500 mm over northeastern Portugal, much of coastal Galicia and along  
238 the southern borders of the Pyrenees but less than 300 mm over southeast Spain (Estrela et al.,  
239 2012). Over Spain, agriculture occupies approximately 50% of the land area (e.g., year 2014,  
240 <https://data.worldbank.org/indicator/AG.LND.AGRI.ZS>), and with around 1200 large dams  
241 (European Working Group on Dams and Floods, 2010).

### 242 **2.3.2. The meteorology forcing**

243 In order to study the sensitivity of the optimization results to different forcing data, three  
244 meteorology forcing are used: WFDEI\_GPCC, WFDEI\_CRU and CRU\_NCEP. The  
245 WFDEI\_GPCC and WFDEI\_CRU (3-hourly, 0.5°) are based on the WFDEI meteorological  
246 forcing data which was produced using WATCH (WATER and global CHange) Forcing Data  
247 (WFD) methodology applied to ERA-Interim data at 0.5° (Weedon et al., 2014; [http://www.eu-  
248 watch.org/data\\_availability](http://www.eu-watch.org/data_availability)). The WFDEI is from 1979 and updates until now with eight  
249 meteorological variables at 3-hourly time steps. The precipitation of WFDEI\_GPCC and  
250 WFDEI\_CRU is corrected by GPCC (Global Precipitation Climatology Centre) and CRU  
251 (Climatic Research Unit), respectively. The CRU\_NCEP (6-hourly, 0.5°) combines the CRU  
252 TS.3.1 (0.5°, monthly) climatology covering 1901-2012 and the NCEP (National Centers for  
253 Environmental Prediction) reanalysis (2.5°, 6-hour) beginning in 1948  
254 (<https://vesg.ipsl.upmc.fr/thredds/fileServer/store/p529viov/crncep/readme.html>). The  
255 precipitation of the three forcing is compared with the IB02 which is a gridded daily rainfall dataset  
256 for the Iberia Peninsula with 0.2° resolution covers 1950 to 2003 (Belo-Pereira et al., 2011). It is  
257 generated by using ordinary kriging from more than 2400 quality-controlled stations.

### 258 **2.3.3. The GRDC dataset**

259 The Global Runoff Database collects the monthly river discharge from most basin agencies  
260 around the world (more than 9,300 stations) with an average record length of 43 years. Although  
261 the quality of the observations is unknown (e.g., monitoring the river transect, velocity  
262 measurements, etc.), the GRDC datasets are the most complete river discharge dataset available  
263 today. It is hosted by the German Federal Institute of Hydrology

264 (Bundesanstalt für Gewässerkunde or BfG;  
265 [www.bafg.de/GRDC/EN/Home/homepage\\_node.html](http://www.bafg.de/GRDC/EN/Home/homepage_node.html)).

#### 266 **2.3.4. Integration of GRDC in ORCHIDEE**

267 The location of some stations in the GRDC dataset might be incorrect for either the  
268 longitude or latitude coordinate due to simple typos, logical errors in the original coordinates, or a  
269 swapped order of the coordinate digits (Lehner, 2012). Due to this uncertainty, a quality control is  
270 applied for GRDC when matching it with the corresponding HTUs in the river routing model. **For**  
271 **each GRDC station, the corresponding catchment surface in the model is estimated.** The matching  
272 process is stringent, and the GRDC qualification is restricted by two matching criteria: (1) the  
273 difference in upstream area between GRDC and the model is less than a pre-defined percentage;  
274 (2) the distance between GRDC and the model is less than a pre-defined distance. The higher the  
275 two thresholds are, the more the matched GRDC stations can be positioned on the model's basin  
276 representation. Meanwhile, the high threshold increases the uncertainties of the GRDC data due to  
277 the errors in location and upstream area. By compromising between the two contradictory  
278 requirements (the number of GRDC stations and the precise of the data), we choose the threshold  
279 for upstream area difference and distance to be 10% and 25 km, respectively. Under this constraint,  
280 27 GRDC stations are qualified among all 65 stations over the Iberian Peninsula domain (10°W-  
281 5.5°E, 34°N-45.5°N; Fig. 2). It should be noted one GRDC station can match with several model  
282 HTUs that locate in different model grids. In this case, the HTU with the lowest upstream area  
283 difference is chosen. Therefore, the GRDC station is not necessarily in the same model grid as the  
284 model HTU.

#### 285 **2.3.5. The evaporation products**

286 The bias corrected evaporation deduced from the assimilation is compared with the  
287 GLEAM (Global Land Evaporation Amsterdam Model; Martens et al., 2017;  
288 <https://www.gleam.eu/>) product. GLEAM provides daily evaporation from 1984 to 2011 at 0.25°.  
289 The evaporation is estimated by a minimalistic Priestley-Taylor potential evaporation model with  
290 the majority of inputs estimated from remote sensing. It uses the microwave-derived soil moisture,  
291 land surface temperature and vegetation density, and the detailed estimation of rainfall interception

292 loss. The rainfall interception loss is estimated separately using the Gash analytical model which  
293 considers the canopy storage capacity, coverage, and the ratio of mean evaporation rate from wet  
294 canopy. There are several versions of GLEAM data available, and we choose the latest version  
295 v3.1a. The precipitation forcing of GLEAM v3.1a is from the Multi-Source Weighted-Ensemble  
296 Precipitation (v1.2).

## 297 **2.4. Experiments design**

298 An ORCHIDEE simulation is performed to obtain the  $Q_{fg}$  and the corresponding  $R$  and  $D$ .  
299 The ORCHIDAS with L-BFGS-B algorithm explores the full space of  $x$  by perturbing a separate  
300  $x (x_i)$  over the  $i$  th upstream catchment ( $i=1, 2, \dots, N_{opt}$ ;  $N_{opt}$  is the total number of optimized  $x$   
301 depending on the number of observation stations) in each iteration. To save computing time, the  
302 river routing parameterization (forced by corrected  $R$  and  $D$ ) rather than the full ORCHIDEE is  
303 executed. The total execution time depends on the number of parameters to be optimized, the  
304 length of simulation years, and the number of iterations. Multi-level parallelisms of the  
305 assimilation are implemented to achieve the high computational efficiency. In each iteration, the  
306 assimilation can run with  $N_{opt}$  ‘river routing’ simulations, with each ‘river routing’ model  
307 parallelized with  $N_{routing}$  CPUs ( $N_{opt}=27$ ,  $N_{routing}=16$  over the study domain). Over the Iberian  
308 Peninsula, the range of  $x$  is defined between 0 and 20 which is determined by  $Q_{fg}$  and  $Q_{obs}$ .

309 In order to check the impacts of prior information  $x_{prior}$  on the optimization convergence  
310 time, the  $x_{prior}$  is set to a constant value ‘1’ ( $x_{prior\_1}$ ) or a ‘pre-estimated-prior’ ( $x_{prior\_ref}$ , defined as  
311 the ratio of  $Q_{obs}/Q_{fg}$ ), separately. The optimal  $x$  values are assigned over the whole study domain.  
312 The  $x$  of the sub-catchment without GRDC station available is set to 1 (no correction). The  
313 climatology values (e.g., over 1979-2014) are applied to fill the observation missing values over  
314 certain period. In case of more than one GRDC stations locate in the same model grid, the averaged  
315 correction factor is used.

316 The optimization results are not sensitive to the choice of  $x_{prior}$ , but the convergence time  
317 indeed depends on  $x_{prior}$ . Fig. 3a shows that the  $x_{prior\_ref}$  method requires less iteration to converge  
318 than  $x_{prior\_1}$  (7 and 15-20 iterations, respectively). The value of the cost function of  $x_{prior\_ref}$  method  
319 is lower than that of  $x_{prior\_1}$  for all iteration steps. The normalized bias ( $Norm\_BIAS$ ) of discharge



320 after 7 iterations is less than 0.3 for the  $x_{prior\_ref}$  method, while it is larger than 0.6 over most south  
 321 regions for  $x_{prior\_J}$  (Figs. 3b and 3c). The oscillation of  $J$  at the steps 3 and 5 could be due to the  
 322 fact that the calculation of the gradient of  $J$  by finite difference is not optimal. It is also possible  
 323 because the L-BFGS-B explores partly the physical range during the first few iteration to estimate  
 324 the Hessian of the cost function for convergence.

$$325 \quad Norm\_BIAS = \frac{Q_{sim} - Q_{obs}}{Q_{obs}}, \quad (8)$$

326 We choose  $x_{prior}$  set by  $x_{prior\_ref}$  for  $n$  years ( $n=10$ , 1980-1989) experiment with iteration  
 327 number  $k$  being 15 and number of correction factor  $m$  (i.e., the number of GRDC station) being 27.  
 328 The  $x$  values vary with different years. Due to the slow variation in aquifer levels, a spin-up is  
 329 necessary before optimization to get equilibrium of aquifer levels in LSM. The spin-up creates the  
 330 aquifer initial states ( $A^0_{corr}, A^1_{corr}, A^2_{corr}, \dots, A^{10}_{corr}$ ) at the start of the assimilation cycles over each  
 331 ORCHIDEE model grid (Fig. 4), making it adapt to the bias corrected aquifer states.

$$332 \quad \frac{dA^i_{corr}}{dt} = \left[ \int_S x(R_2 + D_2) \right] - Q_{corr,2} + Q_{corr,1}, \quad 0 \leq i \leq 10 \quad (9)$$

333 To test different assumptions of errors in initial conditions, we implemented different  
 334 optimization methods with each method results in a group ( $m \times n$ ) of optimal  $x$  (Fig. 4). In method  
 335 1, the optimization is carried out year by year with one-year spin-up for each iteration ('Y1SP1'  
 336 here after). The  $x$  of the optimization year is applied during simulation. The method 2 is similar  
 337 with Y1SP1 except that it uses optimized aquifer levels from the previous year ('Y1SP0' here  
 338 after). This method assumes the final state variables (aquifer levels) of the optimal solution at the  
 339 current optimization year is the best initial condition for the following assimilation year. In method  
 340 3, the optimization is done over 10 years continuously with 1-year spin-up at the beginning of each  
 341 10-year simulation ('Y10C' here after). The Y10C optimizes 270  $x$  over 10 years together, while  
 342 the Y1SP1 and Y1SP0 optimize the 10 years separately with 27  $x$  each year. The 'river routing'  
 343 model running years required by the three methods are 8100 ( $=m \times 2 \times n \times k$ ), 4050 ( $=m \times n \times k$ ) and  
 344 44550 [ $=m \times n \times (n+1) \times k$ ], respectively. Take the Y1SP0 for example, in each iteration, the  
 345 correction factor  $x$  is perturbed by  $m$  times. For each perturbation, the ORCHIDEE river routing  
 346 model runs once with one  $x$  (e.g.,  $x_i$  at the  $i$ th sub-catchment) being perturbed while the  $x$  of other

347 sub-catchments are kept the same. Therefore, the total number of years required for  $m$  stations,  $n$   
348 iterations and  $k$  years assimilation is  $m \times n \times k$ . For all experiments, the optimization is carried out at  
349 daily scale, and the diagnostics are performed for annual averages where we assume the water  
350 storage variation is neglectable.

351 In order to further identify the impacts of atmospheric forcing on optimizations (e.g.,  
352 optimal correction factor  $x$ ), we measure the ‘Uncertainty’ of the variable (‘ $var$ ’ in equation; ‘ $var$ ’  
353 refers to  $x$ , corrected evaporation, etc.) by Eq. (10). The higher the ‘Uncertainty’ is, the larger the  
354 uncertainty is. The 0 value means that all the three ‘ $var$ ’ values are equal.

$$355 \quad \text{Uncertainty}(var) = \frac{|var_1 - var_2| + |var_2 - var_3| + |var_1 - var_3|}{3} \quad (10)$$

### 356 3. Results and discussions

#### 357 3.1. Evaluation of river discharge without assimilation

358 Fig. 5 displays the first guess simulation forced with different atmospheric forcing:  
359 WFDEI\_GPCC (Figs. 5a-5b), WFDEI\_CRU (Figs. 5c-5d), and CRU\_NCEP (Figs. 5e-5f). The  
360 *Norm\_BIAS* and correlation coefficient (computed by the annual mean values) are used to measure  
361 the qualities of the simulated discharge. The diagnostics at each GRDC station are spread to the  
362 entire upstream basin which contributes to the errors in discharge at downstream. The correlation  
363 coefficient between FG (forced by WFDEI\_GPCC and WFDEI\_CRU) and observation is greater  
364 than 0.6 over most regions, but it is less than 0.2 over certain regions (e.g., middle and southeast  
365 of the Iberian Peninsula Figs. 5a and 5c). The correlation coefficient obtained by using  
366 CRU\_NCEP forcing is less than 0.2 for most regions (middle and west of the Iberian Peninsula),  
367 which is worse than the simulation from WFDEI\_GPCC and WFDEI\_CRU. Wang et al. (2016)  
368 also show the relatively poor performance of CRU\_NCEP in simulating global land surface  
369 hydrology and heat fluxes by using the Community Land Model (CLM4.5). The spatial pattern of  
370 the absolute bias in river discharge varies with the atmospheric forcing (not shown). The  
371 normalized bias is then applied to measure the river discharge simulation. The *Norm\_BIAS* in  
372 discharge shows consistent spatial distribution for simulations of three forcing. The *Norm\_BIAS*  
373 (positive) is higher than a factor of 1.5 over south and northeast of the Iberian Peninsula, which

374 means the overestimation of river discharge. The *Norm\_BIAS* is small (within +/- 0.3) over north,  
375 west and southeast of the region (Figs. 5b, 5d and 5f).

### 376 **3.2. Comparison of the three optimization strategies forced by WFDEI\_GPCC**

377 We apply the three assimilate approaches (Y1SP1, Y1SP0, Y10C) to ORCHIDEE  
378 simulations to correct the bias in discharge simulation by WFDEI\_GPCC forcing. Fig. 6 (left)  
379 displays the geographical distribution of the average correction factor  $x$  obtained after the  
380 assimilation. The  $x$  values range between 0 and 1.5 over the study domain. The perfect discharge  
381 simulation corresponds to  $x$  equal 1. The  $x$  value lower than 1 means the discharge in FG  
382 (WFDEI\_GPCC) is overestimated and thus a decrease of  $R$  and  $D$  is required, and vice versa for  $x$   
383 being higher than 1. The further the  $x$  away from 1, the larger the corrections of runoff and drainage  
384 are. The three methods display similar spatial distribution pattern with  $x$  being less than 0.5 over  
385 south and east of the Iberian Peninsula and  $x$  being higher than 1 over north of the Iberian Peninsula.  
386 This spatial distribution of  $x$  is highly consistent with the pattern of *Norm\_BIAS* in FG (discharge  
387 overestimated in south and northeast, underestimated in north).

388 Fig. 6 (central column) shows the correlation coefficient between corrected discharge and  
389 GRDC observations. After assimilation, the correlation of the optimized discharge and  
390 observations is larger than 0.8 over most regions. The correlation coefficient for assimilated  
391 discharge and observation is less than 0.6 (but higher than 0.4) over some regions and seems very  
392 dependent on the forcing. This is probably because there is a contradiction of  $x$  between the  
393 upstream and downstream stations and thus the method has difficulties finding a compromise (e.g.,  
394 over the Ebro basin). In general, the regions with low correlation coefficient are forcing dependent,  
395 while the regions with high correlation coefficient are very consistent among different forcing. Fig.  
396 6 (right) gives the *Norm\_BIAS* in discharge between assimilations and observations. After  
397 assimilation, this positive bias in river discharge has been significantly reduced (within  $\pm 0.3$ ). It  
398 should be mentioned that the  $x_{prior\_ref}$  is able to capture the general distribution pattern of optimal  
399  $x$ , but the performance of river discharge estimation is significantly improved through optimization.  
400 The role of optimization is to find an appropriate correction factor when there are several basins  
401 (with observations) overlaps at upstream

402 A common validation approach is to compare the assimilated river discharge with other  
403 independent data sources. However, the river discharge observations are limited, and the GRDC  
404 is the only comprehensive river discharge datasets at global scale so far. To overcome this  
405 limitation, the assimilated river discharges are also validated over the catchments where the GRDC  
406 stations are discarded during assimilation. Fig. 7 shows the annual mean of river discharge over  
407 the Alcala Del Rio station (-5.98°W, 37.52°N) on the Guadalquivir river (locates at southwest of  
408 Spain) before and after correction. The observation of this station is not assimilated due to its large  
409 upstream area difference (15.53% > 10%) between model (55635 km<sup>2</sup>) and GRDC (46995 km<sup>2</sup>).  
410 The overestimated discharge simulated by the model at this station is also corrected because it  
411 benefits from the correction factor estimated at the Cantillana station (-5.83°W, 37.59°N; 44871  
412 km<sup>2</sup>) which locates at the 15.3 km upstream of Alcala Del Rio station of the Guadalquivir River  
413 (southwest of the Iberian Peninsula). Between the two stations, there are several tributaries flow  
414 to Alcala Del Rio station, which leads to different annual mean river discharges at Cantillana (49.7  
415 m<sup>3</sup>/y) and Alcala Del Rio stations (94.8 m<sup>3</sup>/y). This result illustrates that this approach is able to  
416 correct the river discharge over the entire basin. The discharges for certain sub-basins without  
417 assimilated observations (e.g., observation unavailable or GRDC stations discarded) are corrected  
418 by  $x$  as well. Although the validation datasets are from the same GRDC source, they are from other  
419 independent observation stations thus can be seen as an independent validation ('first order  
420 validation').

421 In summary, all the three methods (Y1SP1, Y1SP0, and Y10C) are able to improve the  
422 river discharge simulation by ORCHIDEE LSM. The correlation coefficient and *Norm\_BIAS* in  
423 discharge obtained from the three methods are generally consistent. The correlation coefficient of  
424 Y10C method in northeast is lower than that of Y1SP0 and Y1SP1, which is probably resulted  
425 from its poor quality of atmospheric forcing. The Y1SP0 consumes less computing time than  
426 Y1SP1 and Y10C, and it does not worsen the optimization results. By compromising between the  
427 accuracy of results and the computing time, we choose Y1SP0 method for the further assimilation.

428 The above assimilations are performed with the same forcing (WFDEI-GPCC) by  
429 assuming the errors in discharge are caused by model defect (e.g., model parameterization, model  
430 structure, etc.). The uncertainties of simulated discharge also result from the atmospheric forcing.  
431 The role of atmospheric forcing in assimilation is discussed in following section.

### 432 3.3. The sensitivity of the optimizations to atmospheric forcing

433 In order to understand the response of the optimizations to different atmospheric forcing  
434 with different precipitation sources, the ORCHIDAS was also run with WFDEI\_CRU and  
435 CRU\_NCEP forcing using Y1SP0 optimization strategy. Using two other different forcing for the  
436 assimilation can allow us to understand how important the forcing uncertainty affects the  
437 correction factor. The multi-year mean correction factor  $x$  obtained from WFDEI\_CRU (Fig. 8a)  
438 CRU\_GPCC (Fig. 8b), and WFDEI\_GPCC (Fig. 8c) displays quite consistent spatial patterns. The  
439 coverage of low correction factor (blue in Figs. 8a-8b, corresponds to large correction) obtained  
440 from CRU-NCEP is larger than that obtained from WFDEI\_CRU and WFDEI\_GPCC. This is  
441 because the positive bias in discharge of FG simulation forced by CRU-NCEP is larger than that  
442 by WFDEI\_CRU and WFDEI\_GPCC. Besides the atmospheric forcing, the uncertainties could  
443 also originate from boundary condition (e.g., topographic or other land surface features), model  
444 parameter, model structure or missing processes. For all forcing, the  $x$  is less than 0.3 (but greater  
445 than 0) over south, which implies that the error in discharge is probably resulted from the missing  
446 model processes (human activity). Over north, the  $x$  are close to 1 (discharge well simulated) for  
447 all the three forcing, which indicates the correction comes from model 'random' error (nature  
448 discharge) rather than the system error (e.g., missing processes).

449 The uncertainty of  $x$  by three forcing is small for most regions (Fig. 8d). The high  
450 uncertainty of  $x$  over the Adoure (southwestern France) and the Chelif (in Algeria) river basins  
451 corresponds to the large uncertainty in the different atmospheric forcing. This result demonstrates  
452 the obtained correction factor  $x$  is robust in spite of using different atmospheric forcing. This is  
453 also demonstrated by comparing the precipitations between the three forcing and the IB02 dataset.  
454 Compared to the IB02, all the three forcing overestimate rainfall in the Iberian Peninsula (Figs.  
455 S1a-S1c), but none of these error patterns resembles that of the proposed  $E$  correction (Figs. 9e-  
456 9g). Unlike the pattern of the correction factor (Figs. 8a-8c), the ratios of annual mean precipitation  
457 between the three forcing and the IB02 are higher than 1 over most regions (Figs. S1d-S1f).  
458 Therefore, the precipitation forcing error is not likely the dominant factor in determining the  
459 correction factor distribution.

460 In summary, the assimilation approach is able to correct errors in lateral water balance  
461 despite using different forcing. Recalling that the corrected  $R+D$  (through  $x$ ) and the precipitation  
462 are known, we then transfer the optimal correction factor  $x$  to the vertical water balance equation  
463 (Eq. 5) to derive the bias corrected evaporation. This will enable us to understand the impacts of  
464 assimilation on evaporation.

### 465 **3.4. Evaporation estimations through the optimal correction factor**

466 The evaporation of FG simulation by different forcing show quite consistent spatial  
467 distribution (Figs. 9a-9c) and small uncertainty ( $<0.2$  mm/d, Fig. 9d) with the value being higher  
468 over north than south. The change of evaporation ( $dE$ ) induced by the correction is consistent for  
469 three forcing (Figs. 9e-9g) with low uncertainties (Fig. 9h). It should be mentioned that the  
470 evaporation for the regions without GRDC stations are not corrected (i.e., correction factor  $x$  equals  
471 1) such as southern France, western Portugal, and northwest, south and southeast of Spain (blank  
472 regions in Fig. 8). The  $dE$  is positive (around 0.2 to 0.4 mm/d) over south and northeast where the  
473 evaporation is underestimated in FG. Cazcarro et al. (2015) show large blue water footprint  
474 (volume of surface and groundwater consumed for production an item) of human activity over  
475 south (Jaén, Sevilla, and Malaga provinces), northeast (Palencia, Burgos, La Rioja, Navarra and  
476 Valladolid provinces), north (Tarragona province) and middle (Toledo province) of Spain (Map.  
477 1 of that paper). The large  $dE$  over south and northeast obtained in current study is consistent with  
478 the blue water footprint of Cazcarro et al. (2015). Figs 9i-9k plot the change of the ratio of water  
479 demand ( $dE$ ) and water supply ( $R+D$ ). This ratio measures the degree of water shortage. The  
480 greater the ratio, the higher level of water shortage. The ratio is larger over south and northeast of  
481 Spain, which is consistent with the results from other studies that measures the water deficits  
482 (Rodríguez-Díaz et al., 2007) and water exploitation index (Pedro-Monzonís et al., 2015) in Spain.  
483 Since we assume that the missing human processes is the main error in ORCHIDEE, the  $dE$  and  
484  $dE/(R+D)$  indicate the changes induced by human processes. The spatial patterns of  $dE$  and  
485  $dE/(R+D)$  are quite consistent with human water exploitation, thus the model missing processes  
486 (e.g., human water usage) is considered as the dominant contribution to  $x$ .

487 We also tested the possibility of improving the river discharge estimation by using a annual  
488 constant correction factor to evaporation ( $X_{Ecorr}$ ), which can be derived from Eq. (6).

489 
$$X_{Ecorr} \approx \frac{E + (1 - x) \cdot (R + D)}{E}, \quad (11)$$

490 
$$E_{corr} = X_{Ecorr} \cdot E \quad (12)$$

491 Although the Eqs. 11-12 are able to improve river discharge estimation by modifying soil  
 492 moisture, the energy and water balance are not conserved. One solution could be to run the full  
 493 ORCHIDEE LSM in the assimilation system with the same cost function as Eq. (7). In this way,  
 494 the intermediate variables are adjusted towards optimal river discharge with the modification of  
 495 evaporation. This approach executes the full ORCHIDEE model thus is very time consuming and  
 496 is beyond the scope of the current study.

### 497 **3.5. The inter-annual variation of correction factor and water cycle**

#### 498 **3.5.1. The inter-annual cycles**

499 All the results so far are obtained by averaging multi-year mean values which provides us  
 500 the bias correction information at spatial scale. To understand the inter-annual cycles of the  
 501 correction and its possible contribution, we analyze the assimilation results over two stations at  
 502 south of Spain where the discharge correction is large during the period of 1980 - 1989 (Fig. 8).

503 The Puente De Palmas station locates on the Guadiana River (southwest of the Iberian  
 504 Peninsula) with an upstream area of 48515 km<sup>2</sup>. The three FG simulations (with different forcing)  
 505 significantly overestimate the river discharge and the runoff coefficient (ratio of discharge and  
 506 precipitation), while the FG(WFDEIG) and FG(WFDEIC) underestimate the inter-annual  
 507 variability comparing with observations (Fig. 10a-10b). The standard-deviation of the annual  
 508 means for observation, FG(WFDEIG), FG(WFDEIC) and FG(CRUN) are 33.8 m<sup>3</sup>/s, 28.8 m<sup>3</sup>/s,  
 509 25.2 m<sup>3</sup>/s and 34.3 m<sup>3</sup>/s, respectively. One reason could be the variation of water usage by  
 510 irrigated agriculture which occupies 90% of the blue water usage (surface water and groundwater)  
 511 in this semiarid basin (Aldaya and Llamas, 2008) or model errors. Besides, there are many  
 512 interconnected wetlands and structurally complex hydrogeological boundaries between the two  
 513 upper-Guadiana aquifer in the upper Guadiana River basin (Van Loon and Van Lanen, 2013).  
 514 These complex features are difficult to represent in model thus large bias exist in river discharge

515 of ORCHIDEE. The correction factor corrects these model defects (Fig. 10c) and it demonstrates  
516 good skill in correcting the inter-annual variability of discharge and runoff coefficient (Fig. 10a-  
517 10b).

518 The Masia De Pompo station (17876 km<sup>2</sup>) is on the Jucar River (southeast of Spain). The  
519 observations over the year 1983, 1988-1989 are obtained from the climatology values due to  
520 the unavailability of GRDC data during this period. During 1980-1989, the inter-annual  
521 variation of observed discharge (and runoff coefficient) and FG simulation is quite inconsistent  
522 (Figs. 10d-10e). This is probably caused by the surface water usage which occupies about 55%  
523 over this basin (Kahil et al., 2016). Most of them are used for agriculture (>80%) and urban  
524 (>10%). Although the improvements in assimilated discharge are small, the correction factor is  
525 able to capture the inter-annual variability in observations (Figs. 10d and 10f).

526 In summary, the inter-annual variation river discharge of FG simulation and  
527 observations does not agree each other over the Guadiana River basin and the Jucar River basin  
528 during 1980-1989. The human water usage (e.g., groundwater or surface water extraction)  
529 process, which is neglected in current ORCHIDEE model, is likely to play an important role in  
530 river discharge variation. The optimized correction factor (varies each year) improves the inter-  
531 annual variability of the modelled river discharge.

### 532 3.5.2. The geographical distribution

533 To further understand the inter-annual variability of corrections over the entire Iberian  
534 Peninsula region, Fig. 11 plots the spatial distribution of inter-annual variability of correction  
535 factor  $x$  and river discharge which is quantified by coefficient of variation as used by Déry et al.  
536 (2011) and Siam and Eltahir Elfatih (2017). In FG (WFDEI\_GPCC) simulation, the inter-annual  
537 variation of discharge is lower than 0.4 over most regions, which indicates an underestimation of  
538 inter-annual variability of river discharge in FG. The inter-annual variability of discharge is  
539 increased after assimilation over south and northeast. This change could be attributed to the  
540 fluctuation of correction factor (human water usage) over these regions. This result agrees with the  
541 results (Map. 6) of Cazcarro et al. (2015) with more large dams in south and northeast (nature  
542 discharge greatly affected by human) than northwest of Spain (nature discharge less affected by



543 human). The inter-annual variability of correction factor  $x$  and discharge for Y1SP0 (CRUN) is  
544 different from others, which mainly results from the different atmospheric forcing.

### 545 **3.6. Comparison of bias corrected evaporation with GLEAM data**

546 In order to evaluate the bias corrected evaporation, Figs. 12a-12h compare the GLEAM  
547 product (v3.1a) with FG and with bias corrected  $E$  by assimilation using WFDEI\_GPCC,  
548 WFDEI\_CRU and CRU\_NCEP forcing. Due to the unavailability of parts of GLEAM's  
549 atmospheric forcing (e.g., air pressure, air humidity, air speed, etc.) and difficulty of maintaining  
550 a coherence with other forcing, the assimilation system does not run with GLEAM's precipitation  
551 input. We find large difference between GLEAM and FG, which indicates that the evaporation is  
552 quite uncertain for different estimations. The geographical distribution and magnitude of  
553 difference in  $E$  between GLEAM and FG is highly consistent with that between GLEAM and bias  
554 corrected values by using different forcing (Figs. 12a-12c, and 12e-12g). The systematic negative  
555 difference is higher than the uncertainties of bias corrected  $E$  with different forcing (Figs. 12d and  
556 12h). Parts of the differences are explained by the lower  $P$  of GLEAM than ORCHIDEE forcing  
557 (Figs. 12i-12l). Generally, the  $P-E$  (in mm/d) of GLEAM is higher than bias corrected value  
558 associated with small uncertainties (Figs. 12m-12t). Because the bias corrected  $P-E$  are corrected  
559 by GRDC observed river discharge, the  $P-E$  ( $\approx$ river discharge) of GLEAM is very likely to be  
560 higher than GRDC observations over the Iberia. This result indicates that some processes are  
561 probably also missing in GLEAM v3.1. We also compared our bias corrected  $E$  with GLEAM v1  
562 data (Miralles et al., 2011), and we find the  $P-E$  between GLEAM v1 and bias corrected values  
563 are quite consistent for different forcing. The results are quite consistent when comparing the  
564 corrected  $E$  with several other products which are obtained by using different methodology and  
565 forcing (e.g., Jung et al., 2009; Vinukollu et al., 2011; Mueller et al., 2013). Considering the  
566 availability of  $P-E$  for GLEAM data which allows to compare it with the bias corrected value, only  
567 the results of GLEAM are shown.

## 568 **4. Conclusions**

569 There has been several studies working on estimation of fresh water input from continent  
570 to ocean (e.g., the Mediterranean Sea) based on observation or modelling approach (e.g., Boukthir  
571 and Barnier, 2000; Mariotti et al., 2002; Struglia et al., 2004; Peucker-Ehrenbrink, 2009; Ludwig

572 [et al., 2009; Szczypta et al., 2012](#)). However, these estimations are limited either by the coarse  
573 temporal resolution for observation approach or by the non-comprehensive representation of  
574 physical processes (e.g., human activities) for modelling approach. As a result, the fresh water  
575 estimations are accompanied with large uncertainties among varies studies. This proposed  
576 methodology aims to improve the estimation of continental water cycles by merging the merits of  
577 observations and modelling approach through data assimilation.

578 The basis of the method is the vertical and lateral water balance equations. The method  
579 assumes that the precipitation minus evaporation from the model simulation is an appropriate first  
580 guess so that all the errors in river discharge end up with runoff and drainage. Under this  
581 assumption, the river discharges simulation at river outlet are expected to be improved by  
582 correcting the runoff and drainage (inputs for river routing model).

583 The idea is achieved by embedding a river routing scheme of ORCHIDEE LSM and GRDC  
584 river discharge observations into a data assimilation system (ORCHIDAS). The system can run  
585 with multi-level parallel computing mode (both the routing model and [the](#) optimization are  
586 parallelized). The river discharge is optimized through applying a correction factor  $x$  to model  
587 runoff and drainage which translates errors in estimated  $P-E$ .

588 The method has been explained through its application over [the](#) Iberian Peninsula with 27  
589 GRDC stations during 1979-1989 with  $x$  values being different each year. Main conclusions are:  
590 First, the optimization results are not sensitive to  $x$  prior information  $x_{prior}$ , and assimilation  
591 strategies, but the setting of  $x_{prior}$  by a ‘pre-estimated-prior’ (defined as  $Q_{obs}/Q_{fg}$ ) indeed converges  
592 faster than other  $x_{prior}$  values. The method Y1SP0 (the model spin-up uses the optimal aquifer  
593 levels of previous optimization year) demonstrates high computing efficiency and comparable  
594 discharge accuracy comparing with the other two methods (Y1SP0, Y10C), thus the Y1SP0 is  
595 recommended (e.g., over [the](#) full Mediterranean catchment). Second, the largest correction of  
596 discharge is found over south and northeast of [the](#) Iberian Peninsula. These regions are  
597 characterized by large blue water footprint with large groundwater and surface water usage by  
598 human activity. It implies that most of the corrections by  $x$  represents the missing human processes  
599 (at least in the south of study domain). This is consistent with the fact that ORCHIDEE model  
600 neglects the human processes (e.g., dam operation, irrigation, etc.). The discharge correction over

601 north of the Iberian Peninsula is relatively small, where is mainly due to model systematic error.  
602 The correction factor  $x$  can also cover errors in the model structure, model parameter, or boundary  
603 conditions (e.g., land surface characteristics imposed to the model). Third, the assimilated  
604 discharges reveal lower bias (from >100% to <30%) and higher inter-annual variability (due to the  
605 fluctuation of water usage) than uncorrected ones. Fourth, the bias corrected evaporation are  
606 compared with the GLEAM v3.1a product. The  $E$  of GLEAM is lower than the optimized  $E$ , while  
607 the  $P-E$  of GLEAM is higher than the optimized values. This different  $P-E$  could be caused by the  
608 different  $P$  forcing and the missing processes in the GLEAM model.

609 The method takes into account both gauged rivers (usually large rivers) and un-gauged  
610 rivers, and it provides discharge estimates at daily scale from 1980 to 2014 with the time range  
611 depend on atmospheric forcing. By using the correction factor of adjacent catchment, this method  
612 also improves the river discharge simulation for the catchment without assimilating observations.  
613 Besides, this method fills the gap of the data missing period (e.g., war, instruments, etc.) by  
614 climatology values, thus the data are complete over the whole period. The proposed method is  
615 supposed to be superior to the simple water-balance methods, because a LSM estimates  $E$  at sub-  
616 diurnal scales with physically based equations and takes advantage of spatial distribution of the  $P$   
617 and  $P-E$ .

618 The result implies the necessity of parameterizing the human water uptake process in the  
619 ORCHIDEE LSM. Besides, the poor quality of the river discharge observations (e.g., 68% stations  
620 are discarded over the Iberian Peninsula) calls for a high quality data. The optimized correction  
621 factors  $x$  are model and atmospheric forcing dependent. It is encouraged to apply this assimilation  
622 method to other models, which will allow us to identify the sources of errors (e.g., model missing  
623 process or forcing data). To improve the calculation efficiency, this study uses annual mean  
624 correction factors without considering its seasonal variation thus the seasonal discharges do not  
625 improved. Further improvements can be made towards optimizing seasonal/monthly  $x$ , but it will  
626 certainly cost more computing resources. Besides, it is possible that a number of optimized  $x$  can  
627 result in the similar river discharge at downstream. Future developments may generate ensemble  
628 optimal  $x$  to mitigate this issue. This assimilation method can be applied for water cycles studies,  
629 data inter-comparison, and riverine fresh water estimation over other basins (e.g., the full  
630 catchment of the Mediterranean sea).

631 **Acknowledgments**

632           The authors gratefully acknowledge financial support provided by the STSE WACMOS-  
633 MED (Water Cycle Multi-mission Observation Strategy for the Mediterranean) project under ESA  
634 (Grant No. 4000114770/15/I-SBo) and the Earth2Observe (Global Earth Observation for  
635 Integrated Water Resource Assessment) project of the FP7 (Grant No. 603608). The ClimServ  
636 computational facilities at IPSL were used to perform all the simulations. [The authors also thank](#)  
637 [the valuable and constructive comments from Emanuel Dutra \(Lisbon University\) and another](#)  
638 [anonymous reviewer.](#)

639 **References:**

- 640 Aldaya, M. M. and Llamas, M. R.: Water footprint analysis for the Guadiana river basin, Value  
641 of Water Research Report Series, No. 35, UNESCO–IHE Delft, The Netherland, 2008.
- 642 aus der Beek, T., Menzel, L., Rietbroek, R., Fenoglio-Marc, L., Grayek, S., Becker, M.,  
643 Kusche, J., Stanev, E.V.: Modeling the water resources of the Black and  
644 Mediterranean Sea river basins and their impact on regional mass changes, *J.*  
645 *Geodyn.* 59–60, 157–167, <http://dx.doi.org/10.1016/j.jog.2011.11.011>, 2012.
- 646 Bauer-Gottwein, P., Jensen, I. H., Guzinski, R., Bredtoft, G. K. T., Hansen, S., and Michailovsky,  
647 C. I.: Operational river discharge forecasting in poorly gauged basins: the Kavango River  
648 basin case study, *Hydrol. Earth Syst. Sci.*, 19, 1469-1485, [https://doi.org/10.5194/hess-19-](https://doi.org/10.5194/hess-19-1469-2015)  
649 [1469-2015](https://doi.org/10.5194/hess-19-1469-2015), 2015.
- 650 [Belo-Pereira, M., Dutra, E., and Viterbo, P.: Evaluation of global precipitation data sets over the](#)  
651 [Iberian Peninsula, \*J. Geophys. Res.\*, 116, D20101, <https://doi.org/10.1029/2010jd015481>,](#)  
652 [2011.](#)
- 653 Bricheno, L. M., Wolf, J. M., and Brown, J. M: Impacts of high resolution model downscaling in  
654 coastal regions, *Cont. Shelf Res.*, 87, 1-16, 2014.
- 655 Boukthir, M. and Barnier, B.: Seasonal and inter-annual variations in the surface freshwater flux  
656 in the Mediterranean Sea from the ECMWF re-analysis project, *Journal of Marine Systems*  
657 24, 343–354, 2000
- 658 Bouraoui, F., Grizzetti, B. and Aloe, A.: Estimation of water fluxes into the Mediterranean Sea, *J.*  
659 *Geophys. Res.*, 115, D21116, doi:10.1029/2009JD013451, 2010.
- 660 Byrd, R. H., Lu, P., Nocedal, J., and Zhu, C.: A limited memory algorithm for bound constrained  
661 optimization, *SIAM J. Sci. Stat. Comput.*, 16, 1190–1208, 1995.
- 662 Cazarro, I., Duarte, R., Martín-Retortillo, M., Pinilla, V., and Serrano, A.: How sustainable is the  
663 increase in the water footprint of the Spanish agricultural sector? A provincial analysis  
664 between 1955 and 2005–2010, *Sustainability*, 7 (5), 5094-5119, doi:10.3390/su7055094,  
665 2015.
- 666 Clark, E. A., Sheffield, J., van Vliet, M., Nijssen, B., and Lettenmaier, D. P.: Continental runoff  
667 into the oceans (1950–2008), *J. Hydrometeor.*, 16, 1502–1520, doi:  
668 <https://doi.org/10.1175/JHM-D-14-0183.1>, 2015

669 Dai, A. G. and Trenberth, K. E.: Estimates of freshwater discharge from continents: Latitudinal  
670 and seasonal variations, *J. Hydrometeor*, 3, 660–687, 2002.

671 De Rosnay, P., Polcher, J., Bruen, M., and Laval, K.: Impact of a physically based soil water flow  
672 and soil-plant interaction representation for modeling large-scale land surface processes, *J*  
673 *Geophys Res*, 107: D11, doi:10.1029/2001JD000634, 2002.

674 Déry, S. J., Mlynowski, T. J., Hernández-Henríquez, M. A., and Straneo F.: Interannual variability  
675 and interdecadal trends in Hudson Bay streamflow, *J. Marine Syst.*, 88, 341–351, 2011.

676 Ducharne, A., Golaz, C., Leblois, E., Laval, K., Polcher, J., Ledoux, E. and de Marsily, G.:  
677 Development of a high resolution runoff routing model, calibration and application to assess  
678 runoff from the LMD GCM, *J. Hydrol.*, 280, 207-228, 2003.

679 Estrela, T., Pérez-Martin, M.A., and Vargas, E.: Impacts of climate change on water resources in  
680 Spain, *Hydrolog. Sci. J.*, 57(6), 1154-1167, doi: 10.1080/02626667.2012.702213, 2012.

681 European Working Group on Dams and Floods: Report on ‘Dams and floods in Europe, role of  
682 dams in floods mitigation’, Pages 1-99, 2010.  
683 [http://cnpqb.apambiente.pt/IcoldClub/jan2012/EWG%20FLOODS%20FINAL%20REPOR](http://cnpqb.apambiente.pt/IcoldClub/jan2012/EWG%20FLOODS%20FINAL%20REPORT.pdf)  
684 [T.pdf](http://cnpqb.apambiente.pt/IcoldClub/jan2012/EWG%20FLOODS%20FINAL%20REPORT.pdf). Accessed 28 October 2017.

685 [Fekete, B. M., C. J. Vorosmarty, W. Grabs.: High-resolution fields of global runoff combining](#)  
686 [observed river discharge and simulated water balances, \*Global Biogeochemical Cycles\*, 16](#)  
687 [\(3\): 15-1 to 15-10, 2002.](#)

688 Guimberteau, M., Drapeau, G., Ronchail, J., Sultan, B., Polcher, J., Martinez, J., Prigent, C., Guyot,  
689 J., Cochonneau, G., Espinoza, J., Filizola, N., Fraizy, P., Lavado, W., De Oliveira, E.,  
690 Pombosa, R., Noriega, L. and Vauchel, P.: Discharge simulation in the sub-basins of the  
691 Amazon using ORCHIDEE forced by new datasets, *Hydrol. Earth Syst. Sc.*, 16, 911-935,  
692 2012.

693 Jin, F., Kitoh, A., and Alpert, P.: Water cycle changes over the Mediterranean: a comparison  
694 study of a super-high-resolution global model with CMIP3, *Philos Trans R Soc A*, 368:  
695 5137–5149, 2010.

696 Jordà, G., Von Schuckmann, K., Josey, S. A., Caniaux, G., Garcia-Lafuente, J., Sammartino, S.,  
697 Özsoy, E., Polcher, J., Notarstefano, G., Poulain, P.-M., Adloff, F., Salat, J., Naranjo, C.,  
698 Schroeder, K., Chiggiato, J., Sannino, G., and Macías, D.: The Mediterranean Sea Heat and

699 Mass Budgets: Estimates, Uncertainties and Perspectives, *Prog. Oceanogr.*,  
700 doi:10.1016/j.pocean.2017.07.001, 2017.

701 Jung, M., Reichstein, M., and Bondeau, A.: Towards global empirical upscaling of FLUXNET  
702 eddy covariance observations: validation of a model tree ensemble approach using a biosphere  
703 model, *Biogeosciences*, 6, 2001–2013, doi:10.5194/bg-6-2001-2009, 2009.

704 Kahil, M., Albiac, J., and Dinar, A.: Improving the performance of water policies: Evidence  
705 from drought in Spain, *Water*, 8, 34, 2016.

706 Kalma, J., McVicar, T., and McCabe, M.: Estimating land surface evaporation: a review of  
707 methods using remotely sensed surface temperature data. *Surv. Geophys.*, 29 (4), 421-469,  
708 doi: 10.1007/s10712-008-9037-z, 2008.

709 Kang, X., Zhang, R. and Wang G.: Effects of different freshwater flux representations in an ocean  
710 general circulation model of the tropical Pacific, *Sci. Bull.*, 62: 345–351, 2017.

711 Krinner, G., Viovy, N., de Noblet-Ducoudré, N., Ogée, J., Polcher, J., Friedlingstein, P., Ciais, P.,  
712 Sitch, S., and Prentice, I. C.: A dynamic global vegetation model for studies of the coupled  
713 atmosphere-biosphere system, *Global Biogeochem. Cycles*, 19: GB1015,  
714 doi:10.1029/2003GB002199, 2005.

715 Kuppel, S., Peylin, P., Chevallier, F., Bacour, C., Maignan, F., and Richardson, A. D.:  
716 Constraining a global ecosystem model with multi-site eddy-covariance data, *Biogeosciences*,  
717 9, 3757-3776, <https://doi.org/10.5194/bg-9-3757-2012>, 2012.

718 Lehner, B., Verdin, K., and Jarvis, A.: New global hydrography derived from spaceborne elevation  
719 data, *Eos, Transactions, AGU*, 89(10): 93-94, doi:10.1029/2008EO100001, 2008.

720 Lehner, B.: Derivation of watershed boundaries for GRDC gauging stations based on the  
721 HydroSHEDS drainage network, GRDC Report Series, 41, Global Runoff Data Centre, 2012.  
722 [http://www.bafg.de/GRDC/EN/02\\_srvcs/24\\_rprtsrs/report\\_41.pdf?\\_\\_blob=publicationFile](http://www.bafg.de/GRDC/EN/02_srvcs/24_rprtsrs/report_41.pdf?__blob=publicationFile).  
723 Accessed: 29 September 2017.

724 Li, Y., Ryu, D., Western, A. W., and Wang, Q. J.: Assimilation of stream discharge for flood  
725 forecasting: Updating a semidistributed model with an integrated data assimilation  
726 scheme, *Water Resour. Res.*, 51, 3238–3258, doi:10.1002/2014WR016667, 2015.

727 Liu, X., Tang, Q., Cui, H., Mu, M., Gerten, D., Gosling, S., Masaki, Y., Satoh, Y., and  
728 Wada, Y.: Multimodel uncertainty changes in simulated river flows induced by

729 human impact parameterizations, *Environ Res Lett.*, 12, 025009, doi: 10.1088/1748-  
730 9326/aa5a3a, 2017.

731 Ludwig, W., Dumont, E., Meybeck, M. and Heussner, S.: River discharges of water and nutrients  
732 to the Mediterranean and Black Sea: Major drivers for ecosystem changes during past and  
733 future decades? *Prog. Oceanogr.*, 80, 199–217, doi:10.1016/j.pocean.2009.02.001, 2009.

734 [MacBean, N., Maignan, F., Peylin, P., Bacour, C., Bréon, F.-M., and Ciais, P.: Using satellite data  
735 to improve the leaf phenology of a global terrestrial biosphere model, \*Biogeosciences\*, 12,  
736 7185-7208, doi: 10.5194/bg-12-7185-2015, 2015.](#)

737 MacDonald, A. M., Bonsor, H. C., Ahmed, K. M., Burgess, W. G., Basharat, M., Calow, R. C.,  
738 Dixit, A., Foster, S. S. D., Gopal, K., Lapworth, D. J., Lark, R. M., Moench, M., Mukherjee,  
739 A., Rao, M. S., Shamsudduha, M., Smith, L., Taylor, R. G., Tucker, J., van Steenberg, F.  
740 and Yadav, S. K.: Groundwater quality and depletion in the Indo-Gangetic Basin mapped  
741 from in situ observations, *Nat. Geosci.*, 9, 762-766, 10.1038/ngeo2791, 2016.

742 Mariotti, A., Struglia, M. V., Zeng, N., and Lau, K-M.: The hydrological cycle in the  
743 Mediterranean region and implications for the water budget of the Mediterranean Sea, *J.*  
744 *Climate*, 15, 1674–1690, 2002.

745 Martens, B., Miralles, D.G., Lievens, H., van der Schalie, R., de Jeu, R.A.M., Fernández-Prieto,  
746 D., Beck, H.E., Dorigo, W.A., and Verhoest, N.E.C.: GLEAM v3: satellite-based land  
747 evaporation and root-zone soil moisture, *Geosci. Model Dev.*, 10, 1903–1925, doi:  
748 10.5194/gmd-10-1903-2017, 2017.

749 Miralles, D. G., Holmes, T. R. H., De Jeu, R. A. M., Gash, J. H., Meesters, A. G. C. A., and  
750 Dolman, A. J.: Global land-surface evaporation estimated from satellite-based observations,  
751 *Hydrol. Earth Syst. Sci.*, 15, 453–469, doi:10.5194/hess-15-453-2011, 2011.

752 [Mueller, B., Hirschi, M., Jimenez, C., Ciais, P., Dirmeyer, P. A., Dolman, A. J., Fisher, J. B., Jung,  
753 M., Ludwig, F., Maignan, F., Miralles, D., McCabe, M. F., Reichstein, M., Sheffield, J., Wang,  
754 K. C., Wood, E. F., Zhang, Y., and Seneviratne, S. I.: Benchmark products for land  
755 evapotranspiration: LandFlux-EVAL multi-dataset synthesis, \*Hydrol. Earth Syst. Sci.\*, 17,  
756 3707-3720, doi:10.5194/hess-17-3707-2013, 2013.](#)

757 Munier, S., Palanisamy, H., Maisongrande, P., Cazenave, A., and Wood, E. F.: Global runoff  
758 anomalies over 1993–2009 estimated from coupled Land–Ocean–Atmosphere water budgets



759 and its relation with climate variability, *Hydrol. Earth Syst. Sci.*, 16, 3647-3658,  
760 <https://doi.org/10.5194/hess-16-3647-2012>, 2012.

761 Ngo-Duc, T., Laval, K., Ramillien, G., Polcher, J., and Cazenave, A.: Validation of the land water  
762 storage simulated by Organising Carbon and Hydrology in Dynamic Ecosystems  
763 (ORCHIDEE) with Gravity Recovery and Climate Experiment (GRACE) data, *Water Resour.*  
764 *Res.*, 43, W04427, doi:10.1029/2006WR004941, 2007.

765 Nguyen-Quang, T., Polcher, J., Ducharne, A., Arsouze, T., Zhou, X., Schneider, A., and Fita, L.:  
766 ORCHIDEE-ROUTING: A new river routing scheme using a high resolution hydrological  
767 database, *Geosci. Model Dev. Discuss.*, <https://doi.org/10.5194/gmd-2018-57>, in review,  
768 2018.

769 Pauwels, V. R. N., and De Lannoy, G. J. M.: Ensemble-based assimilation of discharge into  
770 rainfall-runoff models: A comparison of approaches to mapping observational information to  
771 state space, *Water Resour. Res.*, 45, W08428, doi:10.1029/2008WR007590, 2009.

772 Pedro-Monzonís M., Solera, A., Ferrer, J., Estrela, T., Paredes-Arquiola, J. A.: review of water  
773 scarcity and drought indexes in water resources planning and management, *J*  
774 *Hydrol*, 527:482–493. doi:10.1016/j.jhydrol.2015.05.003, 2015.

775 Peucker-Ehrenbrink, B.: Land2Sea database of river drainage basin sizes, annual water discharges,  
776 and suspended sediment fluxes, *Geochem. Geophys. Geosyst.*, 10, Q06014,  
777 doi:10.1029/2008GC002356, 2009.

778 Peylin, P., Bacour, C., MacBean, N., Leonard, S., Rayner, P., Kuppel, S., Koffi, E., Kane, A.,  
779 Maignan, F., Chevallier, F., Ciais, P., and Prunet, P.: A new stepwise carbon cycle data  
780 assimilation system using multiple data streams to constrain the simulated land surface carbon  
781 cycle, *Geosci. Model Dev.*, 9, 3321-3346, <https://doi.org/10.5194/gmd-9-3321-2016>, 2016.

782 Pokhrel, Y. N., Felfelani, F., Shin, S., Yamada, T. J., and Satoh, Y.: Modeling large-scale human  
783 alteration of land surface hydrology and climate, *Geoscience Letters*, 4(1): 1-13,  
784 doi:10.1186/s40562-017-0076-5, 2017.

785 Polcher, J.: Les processus de surface a l'échelle globale et leurs interactions avec l'atmosphère,  
786 Habilitation à diriger des recherches, Université Paris VI, Paris, France, 2003

787 Reynolds, C. A., Jackson, T. J., and Rawls, W. J.: Estimating soil water holding capacities by  
788 linking the Food and Agriculture Organization Soil map of the world with global pedon

789 databases and continuous pedotransfer functions, *Water Resour. Res.*, 36(12): 3653–3662,  
790 2000.

791 Romanou, A., Tselioudis, G., Zerefos, C. S., Clayson, C.-A., Curry, J. A., and Andersson, A.:  
792 Evaporation–precipitation variability over the Mediterranean and the Black Seas from satellite  
793 and reanalysis estimates, *J. Climate*, 23, 5268–5287, doi:10.1175/2010JCLI3525.1, 2010.

794 Rodríguez-Díaz, J. A., Knox, J. W., and Weatherhead, E. K.: Competing demands for irrigation  
795 water: golf and agriculture in Spain, *Irrig. Drain.*, 56:541–549, 2007.

796 Santaren, D., Peylin, P., Viovy, N., and Ciais, P.: Optimizing a process-based ecosystem model  
797 with eddy-covariance flux measurements: A pine forest in southern France, *Global*  
798 *Biogeochem. Cy.*, 21, GB2013, doi: 10.1029/2006GB002834, 2007.

799 [Santaren, D., Peylin, P., Bacour, C., Ciais, P., and Longdoz, B.: Ecosystem model optimization](#)  
800 [using in situ flux observations: benefit of Monte Carlo versus variational schemes and](#)  
801 [analyses of the year-to-year model performances, \*Biogeosciences\*, 11, 7137-7158,](#)  
802 [doi:10.5194/bg-11-7137-2014, 2014.](#)

803 Scherbakov, A. V. and Malakhova, V. V.: The Influence of Time Step Size on the Results of  
804 Numerical Modeling of Global Ocean Climate, *Numerical Analysis and Applications*, 4(2),  
805 175–187, 2011.

806 Szczypta, C., Decharme, B., Carrer, D., Calvet, J.-C., Lafont, S., Somot, S., Faroux, S., and Martin,  
807 E.: Impact of precipitation and land biophysical variables on the simulated discharge of  
808 European and Mediterranean rivers, *Hydrol. Earth Syst. Sci.*, 16, 3351-3370,  
809 <https://doi.org/10.5194/hess-16-3351-2012>, 2012.

810 Sevault, F., Somot, S., Alias, A., Dubois, C., Lebeau-pin-Brossier, C., Nabat, P., Adloff, F., Déqué,  
811 M., and Decharme, B.: A fully coupled Mediterranean regional climate system model: Design  
812 and evaluation of the ocean component for the 1980-2012 period, *Tellus*, 66A, 23967,  
813 doi:10.3402/tellusa.v66.23967, 2014.

814 Shaltout, M. and Omstedt, A.: Modelling the water and heat balances of the Mediterranean Sea  
815 using a two-basin model and available meteorological, hydrological, and ocean data.  
816 *Oceanologia*, 57:116–131, 2015.

817 Siam, M. S., and Eltahir Elfatih, A. B.: Climate change enhances interannual variability of the Nile  
818 river flow, *Nat. Clim. Change*, doi: 10.1038/nclimate3273, 2017.

819 Sichangi, W.A, Wang, L., Yang, K., Chen, D., Wang, Z., Li, X., Zhou, J., Liu, W., and Kuria. D.:  
820 Estimating continental river basin discharges using multiple remote sensing data sets, *Remote*  
821 *Sens. Environ.*, 179: 36-53, <https://doi.org/10.1016/j.rse.2016.03.019>, 2016.

822 Struglia, M.V., Mariotti, A., and Filograsso, A.: River discharge into the Mediterranean Sea:  
823 climatology and aspects of the observed variability, *J. Clim.*, 17, 4740-4751,  
824 doi: 10.1175/JCLI-3225.1, 2004.

825 Syed, T. H., Famiglietti, J. S., Chambers, D. P., Willis, J. K., and Hilburn, K.: Satellite-based  
826 global-ocean mass balance estimates of interannual variability and emerging trends in  
827 continental freshwater discharge, *Proc. Natl. Acad. Sci., USA*, 42, 17916–17921,  
828 doi:10.1073/pnas.1003292107, 2010.

829 Tixeront, J.: Le bilan hydrologique de la Mer Noire et de la Mer Méditerranée, *Cahiers*  
830 *Océanographiques*, 22(3), 227–237, 1970.

831 Vargas-Amelin, E. and Pindado, P.: The challenge of climate change in Spain: water resources,  
832 agriculture and land, *J. Hydrol.*, 518, 243-249, doi:10.1016/j.jhydrol.2013.11.035, 2014.

833 Verri, G., Pinardi, N., Oddo, P., Ciliberti, S. A., and Coppini, G.: River runoff influences on the  
834 Central Mediterranean Overturning Circulation, *Clim. Dynam.*, in press, 2017.

835 [Van Loon, A. F. and Van Lanen H. A. J.: Making the distinction between water scarcity and](#)  
836 [drought using an observation-modeling framework, \*Water Resour Res\*, 49,](#)  
837 [doi:10.1002/wrcr.20147, 2013.](#)

838 [Vinulcollu, R.K., Wood, E.F., Ferguson, C.R., Fisher, J.B.: Global estimates of evapotranspiration](#)  
839 [for climate studies using multi-sensor remote sensing data: Evaluation of three process-based](#)  
840 [approaches, \*Remote sensing of environment\*, 115\(3\):801-23, 2011.](#)

841 [Vorosmarty, C. J., Fekete B. M., and Tucker B. A.: Global River Discharge, 1807-1991, V. 1.1](#)  
842 [\(RivDIS\). ORNL DAAC, Oak Ridge, Tennessee, USA.](#)  
843 <https://doi.org/10.3334/ORNLDAAC/199>, 1998.

844 Wang, A., Zeng, X., and Guo, D.: Estimates of global surface hydrology and heat fluxes from the  
845 Community Land Model (CLM4.5) with four atmospheric forcing datasets, *J. Hydrometeorol.*,  
846 17, 2493–2510, 2016.

847 Wang, Q., Wekerle, C., Danilov, S., Wang, X., and Jung, T.: A 4.5 km resolution Arctic Ocean  
848 simulation with the global multi-resolution model FESOM1.4, *Geosci. Model Dev. Discuss.*,  
849 <https://doi.org/10.5194/gmd-2017-136>, in review, 2017.

850 Weedon, G. P., Balsamo, G., Bellouin, N., Gomes, S., Best, M. J., and Viterbo P.: The WFDEI  
851 meteorological forcing data set: WATCH Forcing Data methodology applied to ERA-Interim  
852 reanalysis data, *Water Resour. Res.*, 50(9), 7505–7514, doi:10.1002/2014WR015638, 2014.  
853 Zhou, X., Polcher, J., Yang, T., Hirabayashi, Y., and Nguyen-Quang, T.: Understanding the water  
854 cycle over the upper Tarim basin: retrospect the estimated discharge bias to atmospheric  
855 variables and model structure, *Hydrol. Earth Syst. Sci. Discuss.*, [https://doi.org/10.5194/hess-](https://doi.org/10.5194/hess-2018-88)  
856 2018-88, in review, 2018.

857 **Figure captions:**

858 **Figure 1.** (a) The illustration of correcting river discharge ( $Q$ ) simulation (simulation in blue solid  
859 dot, observation in red star) by applying correction factors ( $x$ ) to runoff and drainage over different  
860 basins. The basin 1 and basin 2 are represented in yellow and blue, respectively. (b) The model  
861 framework of the river discharge assimilation. The blue and red parts are run for ‘First Guess’ and  
862 for assimilation, respectively.

863 **Figure 2.** The river network (blue lines) and the GRDC stations (solid dots represent the 27  
864 qualified stations and the gray triangles represent unqualified stations) over the study domain.

865 **Figure 3.** (a) The variation of cost function  $J$  (unit: 1; logarithmic y-axis) with iterations for  $x_{prior\_1}$   
866 ( $x_{prior} = 1$ , in blue) and for  $x_{prior\_ref}$  ( $x_{prior} = \text{pre-estimated-prior}$ , in red). The iterations 6-15 are  
867 enlarged in the window (normal y-axis). The  $Norm\_BIAS$  of optimized river discharge after 7  
868 iterations for  $x_{prior\_1}$  (b) and for  $x_{prior\_ref}$  (c).

869 **Figure 4.** The set-up of assimilation experiments for  $n$  years ( $n=10$ , 1980-1989) and  $k$  iterations  
870 ( $k=10$ ) with  $m$  ( $m=27$ ) correction factors ( $x$ ) each year ( $x$  is different over years). (a) The  $i$ th year  
871 ( $Y_i$ ) optimization is initialized by the end of  $Y_{i-1}$  optimization; (b) the initial condition of  $Y_i$   
872 optimization is got by running  $Y_{i-1}$  optimization fed with the same  $x$  as  $Y_i$ ; (c) optimizing  $n$  years  
873 together with one year spin-up at the beginning of  $n$ -year. The Y1SP0 and Y1SP1 divide the  $n$ -  
874 year optimization into  $n$  1-year optimization periods. The blue and red colors mean optimization  
875 and spin-up simulations, respectively.

876 **Figure 5.** The river discharge simulations from 1980 to 1989 using WFDEI\_GPCC (1<sup>st</sup> row),  
877 WFDEI\_CRU (2<sup>nd</sup> row) and CRU\_NCEP (3<sup>rd</sup> row) forcing. Left: the correlation coefficient of  
878 river discharge between observations and simulations; Right: the  $Norm\_BIAS$  of simulated river  
879 discharge.

880 **Figure 6.** The optimization results from 1980 to 1989 using the three methods (1<sup>st</sup> row: Y1SP1;  
881 2<sup>nd</sup> row: Y1SP0; 3<sup>rd</sup> row: Y10C) forced by WFDEI\_GPCC. Left: the optimized correction factor  
882  $x$ ; Middle: the correlation coefficient of river discharge between observations and optimizations;  
883 Right: the  $Norm\_BIAS$  of optimized river discharge.

884 **Figure 7.** The annual cycles of river discharge for ‘First Guess’ (FG) forced by WFDEI-GPCC  
885 (black), Y1SP1 (blue), Y1SP0 (green), Y10C (yellow) and GRDC observations (red) over the

886 Alcala Del Rio station (-5.98°W, 37.52°N) on the Guadalquivir river. The dotted lines mean the  
887 trend.

888 **Figure 8.** The correction factor  $x$  obtained from Y1SP0 forced by (a) WFDEI\_CRU, (b)  
889 CRU\_NCEP, (c) WFDEI\_GPCC, and (d) the ‘Uncertainty’ (defined by Eq. 10) of  $x$  by different  
890 forcing. All values are averaged over 1980-1989.

891 **Figure 9.** The evaporation ( $E$ , in mm/d) before assimilation (1<sup>st</sup> line), change of evaporation ( $dE$ ,  
892 in mm/d) after and before assimilation (2<sup>nd</sup> line), and the ratio of  $dE$  and runoff + drainage (3<sup>rd</sup> line)  
893 for forcing WFDEI-GPCC (1<sup>st</sup> column), WFDEI-CRU (2<sup>nd</sup> column), CRU-NCEP (3<sup>rd</sup> column),  
894 and the ‘Uncertainty’ (defined by Eq. 10) in different forcing (4<sup>th</sup> column) averaged from 1980 to  
895 1989.

896 **Figure 10.** The optimization results by different atmospheric forcing (WFDEI-GPCC in black,  
897 WFDEI-CRU in green, and CRU-NCEP in blue) over the Puente De Palmas station on Guadiana  
898 River (a-d, -6.97°W, 38.88°N; 48515 km<sup>2</sup>) and over the Masia De Pompo station on the Jucar river  
899 (e-h, -0.65°W, 39.15°N; 17876 km<sup>2</sup>): (a, d) annual river discharges; (b, e) runoff coefficient; (e, f)  
900 optimized correction factor  $x$  for the simulated/assimilated river discharge (First Guess in dark  
901 color, Y1SP0 in light color) with respect to GRDC observations (in red) from 1980 to 1989.

902 **Figure 11.** The inter-annual variation of correction factor  $x$  ( $\frac{\sigma(x)}{\bar{x}}$ ; a, d, g), simulated river discharge  
903 without assimilation ( $\frac{\sigma(Q_{sim})}{Q_{sim}}$ ; b, e, h) and optimized river discharge ( $\frac{\sigma(Q_{opt})}{Q_{opt}}$ ; c, f, i) for  
904 Y1SP0\_WFDEIGPCC (1<sup>st</sup> row), Y1SP0\_WFDEICRU (2<sup>nd</sup> row) and Y1SP0\_CRUNCEP (3<sup>rd</sup> row)  
905 averaged over 1980-1989.

906 **Figure 12.** Comparison of evaporation ( $E$ , in mm/d, 1<sup>st</sup> line) between GLEAM (v3.1) and FG (First  
907 Guess), as well as  $E$  (2<sup>nd</sup> line), precipitation ( $P$ , in mm/d, 3<sup>rd</sup> line),  $P-E$  (in mm/d, 4<sup>th</sup> line) and  $P-E$   
908 (relative value between 0-1, 5<sup>th</sup> line) between GLEAM (v3.1) and assimilated values using  
909 different forcing (1<sup>st</sup> column: WFDEI-GPCC; 2<sup>nd</sup> column: WFDEI-CRU; 3<sup>rd</sup> column: CRU-NCEP;  
910 4<sup>th</sup> column: ‘Uncertainty’ (defined by Eq. 10) of using different forcing) averaged from 1980 to  
911 1989.

**Table 1.** The assimilation and simulation experiments

| <b>Name</b>   | <b>Atmospheric Forcing</b> | <b>Method</b>      |
|---------------|----------------------------|--------------------|
| FG(WFDEIG)    | WFDEI_GPCC                 | No assimilation    |
| FG(WFDEIC)    | WFDEI_CRU                  | No assimilation    |
| FG(CRUN)      | CRU_NCEP                   | No assimilation    |
| Y1SP0(WFDEIG) | WFDEI_GPCC                 | Y1SP0 assimilation |
| Y1SP1(WFDEIG) | WFDEI_GPCC                 | Y1SP1 assimilation |
| Y10C(WFDEIG)  | WFDEI_GPCC                 | Y10C assimilation  |
| Y1SP0(WFDEIC) | WFDEI_CRU                  | Y1SP0 assimilation |
| Y1SP0(CRUN)   | CRU_NCEP                   | Y1SP0 assimilation |

Note: All runs are from 1980 to 1989 with 0.5° spatial resolution; FG stands for ‘[First Guess](#)’.

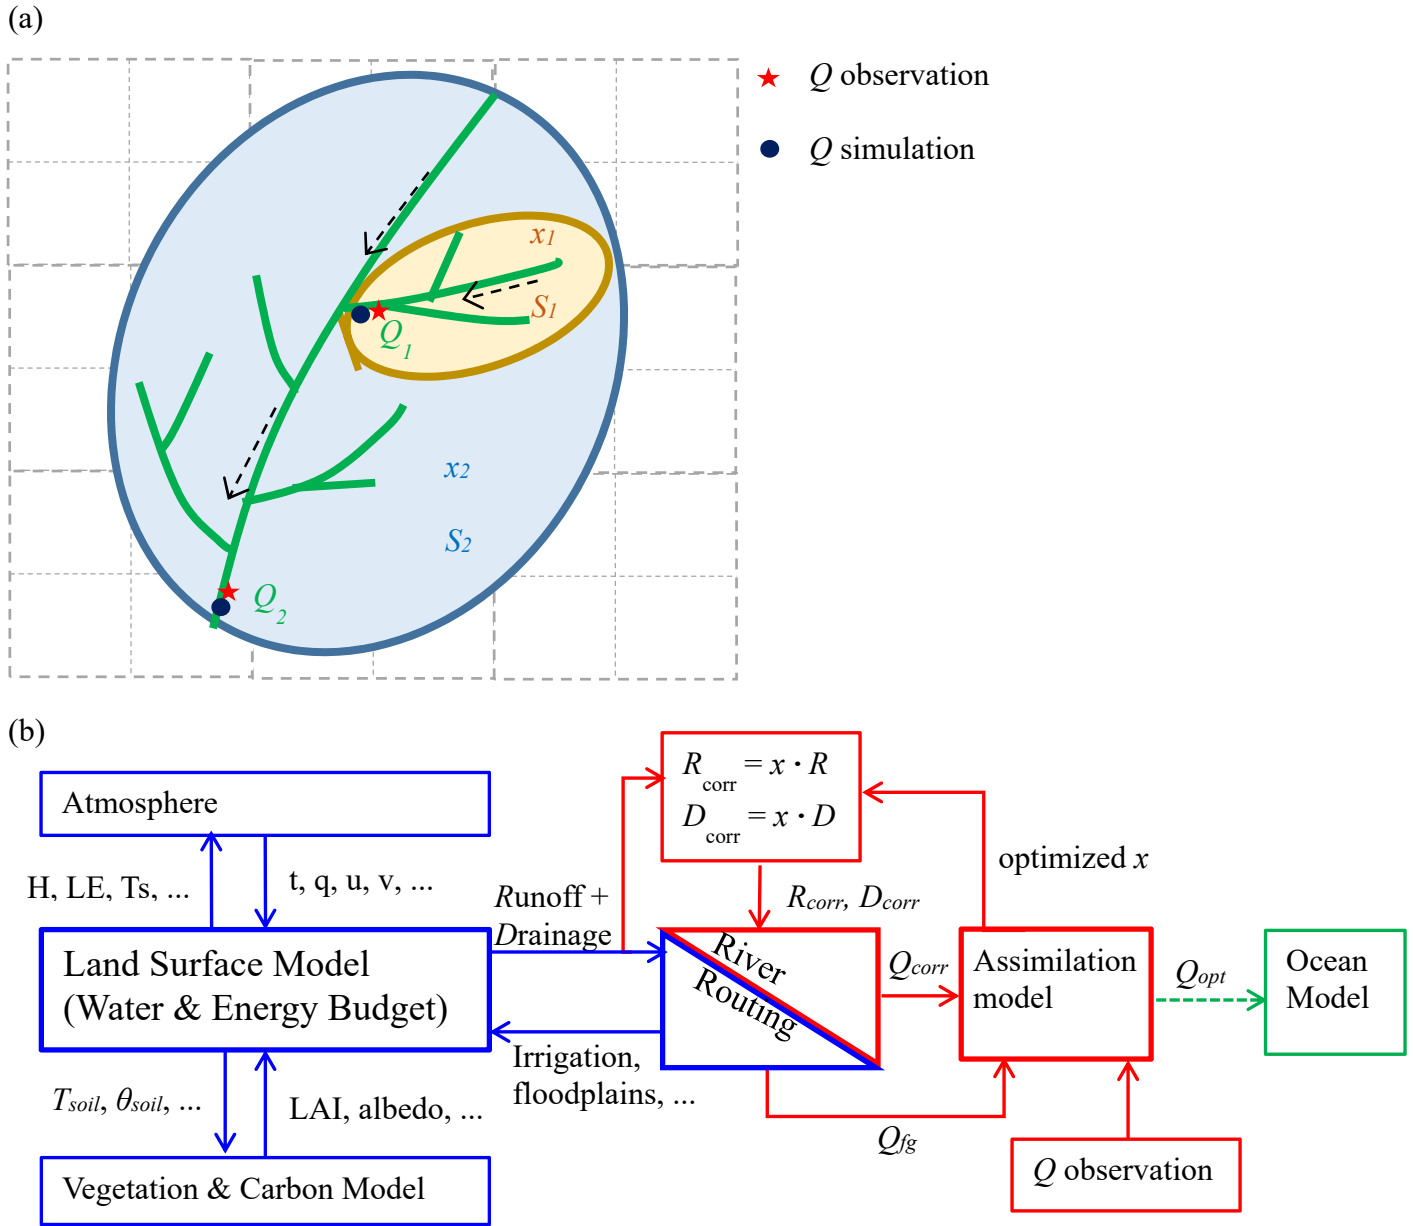

**Figure 1.** (a) The illustration of correcting river discharge ( $Q$ ) simulation (simulation in blue solid dot, observation in red star) by applying correction factors ( $x$ ) to runoff and drainage over different basins. The basin 1 and basin 2 are represented in yellow and blue, respectively. (b) The model framework of the river discharge assimilation. The blue and red parts are run for ‘First Guess’ and for assimilation, respectively.



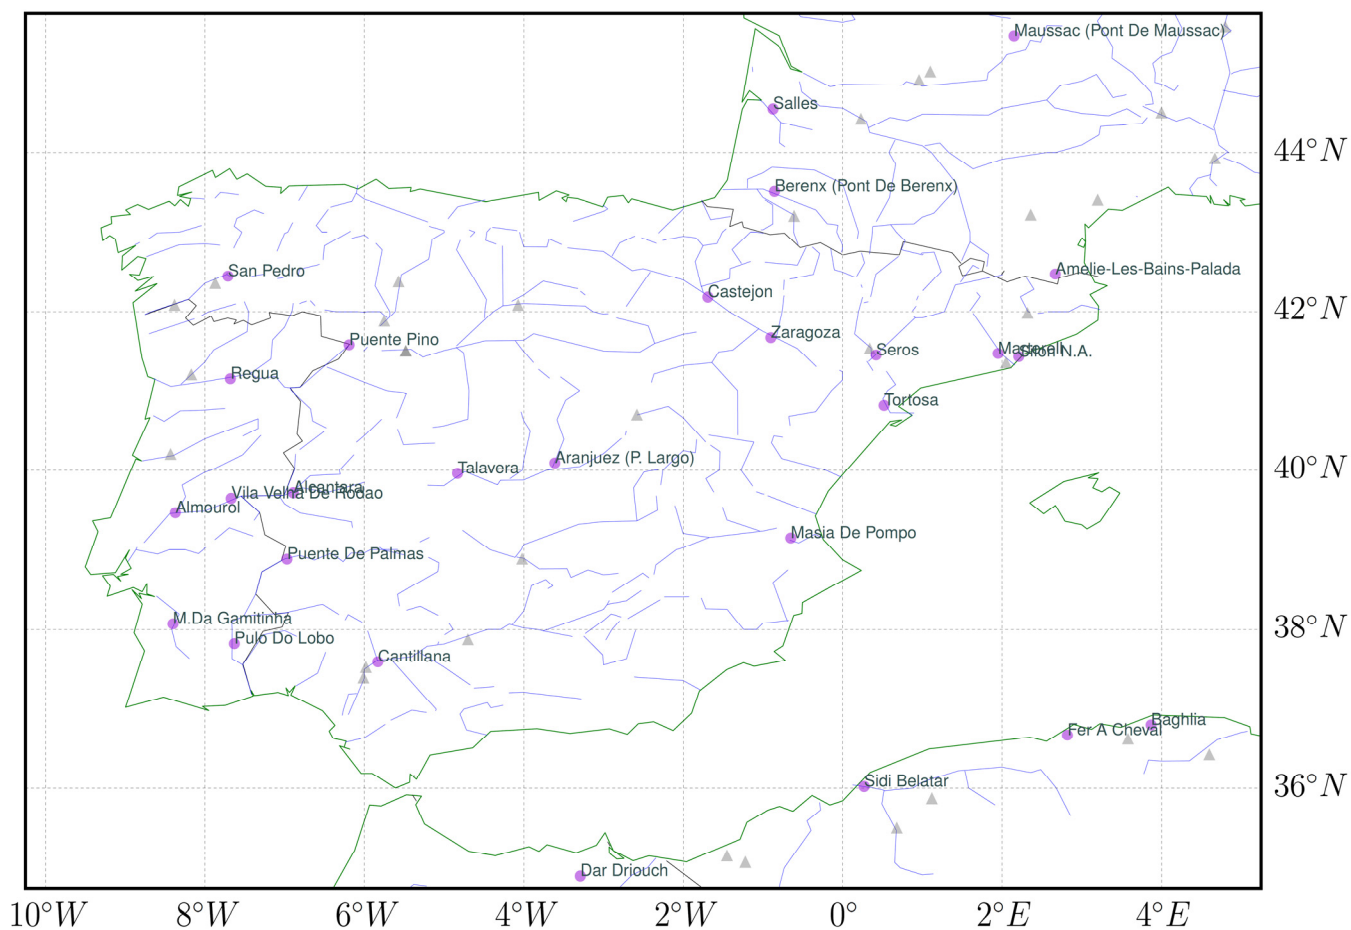

**Figure 2.** The river network (blue lines) and the GRDC stations (solid dots represent the 27 qualified stations and the gray triangles represent unqualified stations) over the study domain.

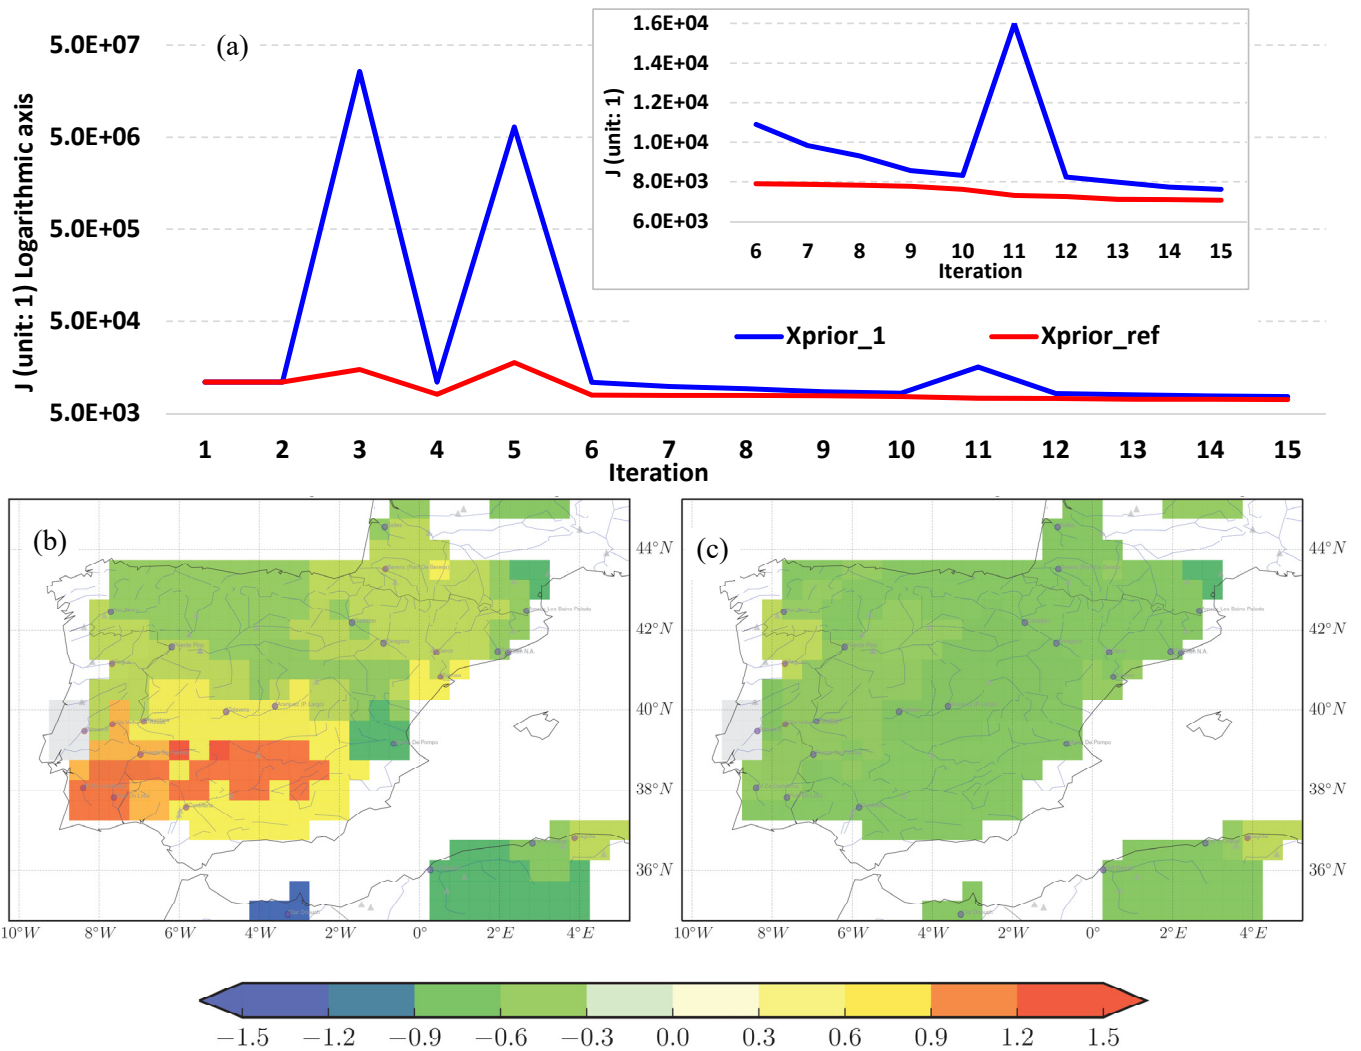

**Figure 3.** (a) The variation of cost function  $J$  (unit: 1; logarithmic y-axis) with iterations for  $x_{prior\_1}$  ( $x_{prior} = 1$ , in blue) and for  $x_{prior\_ref}$  ( $x_{prior} = \text{pre-estimated-prior}$ , in red). The iterations 6-15 are enlarged in the window (normal y-axis). The  $Norm\_BIAS$  of optimized river discharge after 7 iterations for  $x_{prior\_1}$  (b) and for  $x_{prior\_ref}$  (c).

(a) Y1SP1

$m$  factors to optimize,  $k$  iterations

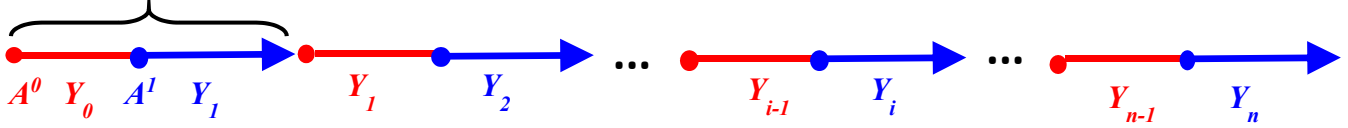

(b) Y1SP0

$m$  factors to optimize,  $k$  iterations

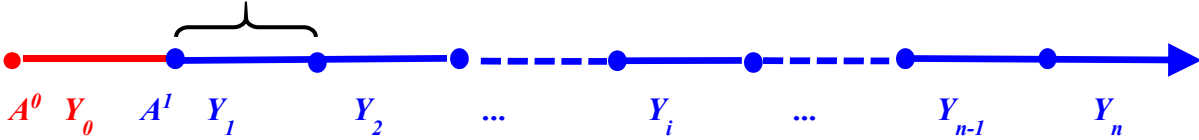

(c) Y10C

$m \times n$  factors to optimize,  $k$  iterations

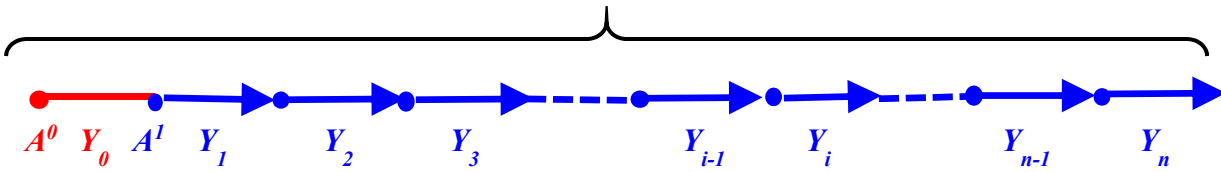

**Figure 4.** The set-up of assimilation experiments for  $n$  years ( $n=10$ , 1980-1989) and  $k$  iterations ( $k=10$ ) with  $m$  ( $m=27$ ) correction factors ( $x$ ) each year ( $x$  is different over years). (a) The  $i$ th year ( $Y_i$ ) optimization is initialized by the end of  $Y_{i-1}$  optimization; (b) the initial condition of  $Y_i$  optimization is got by running  $Y_{i-1}$  optimization fed with the same  $x$  as  $Y_i$ ; (c) optimizing  $n$  years together with one year spin-up at the beginning of  $n$ -year. The Y1SP0 and Y1SP1 divide the  $n$ -year optimization into  $n$  1-year optimization periods. The blue and red colors mean optimization and spin-up simulations, respectively.

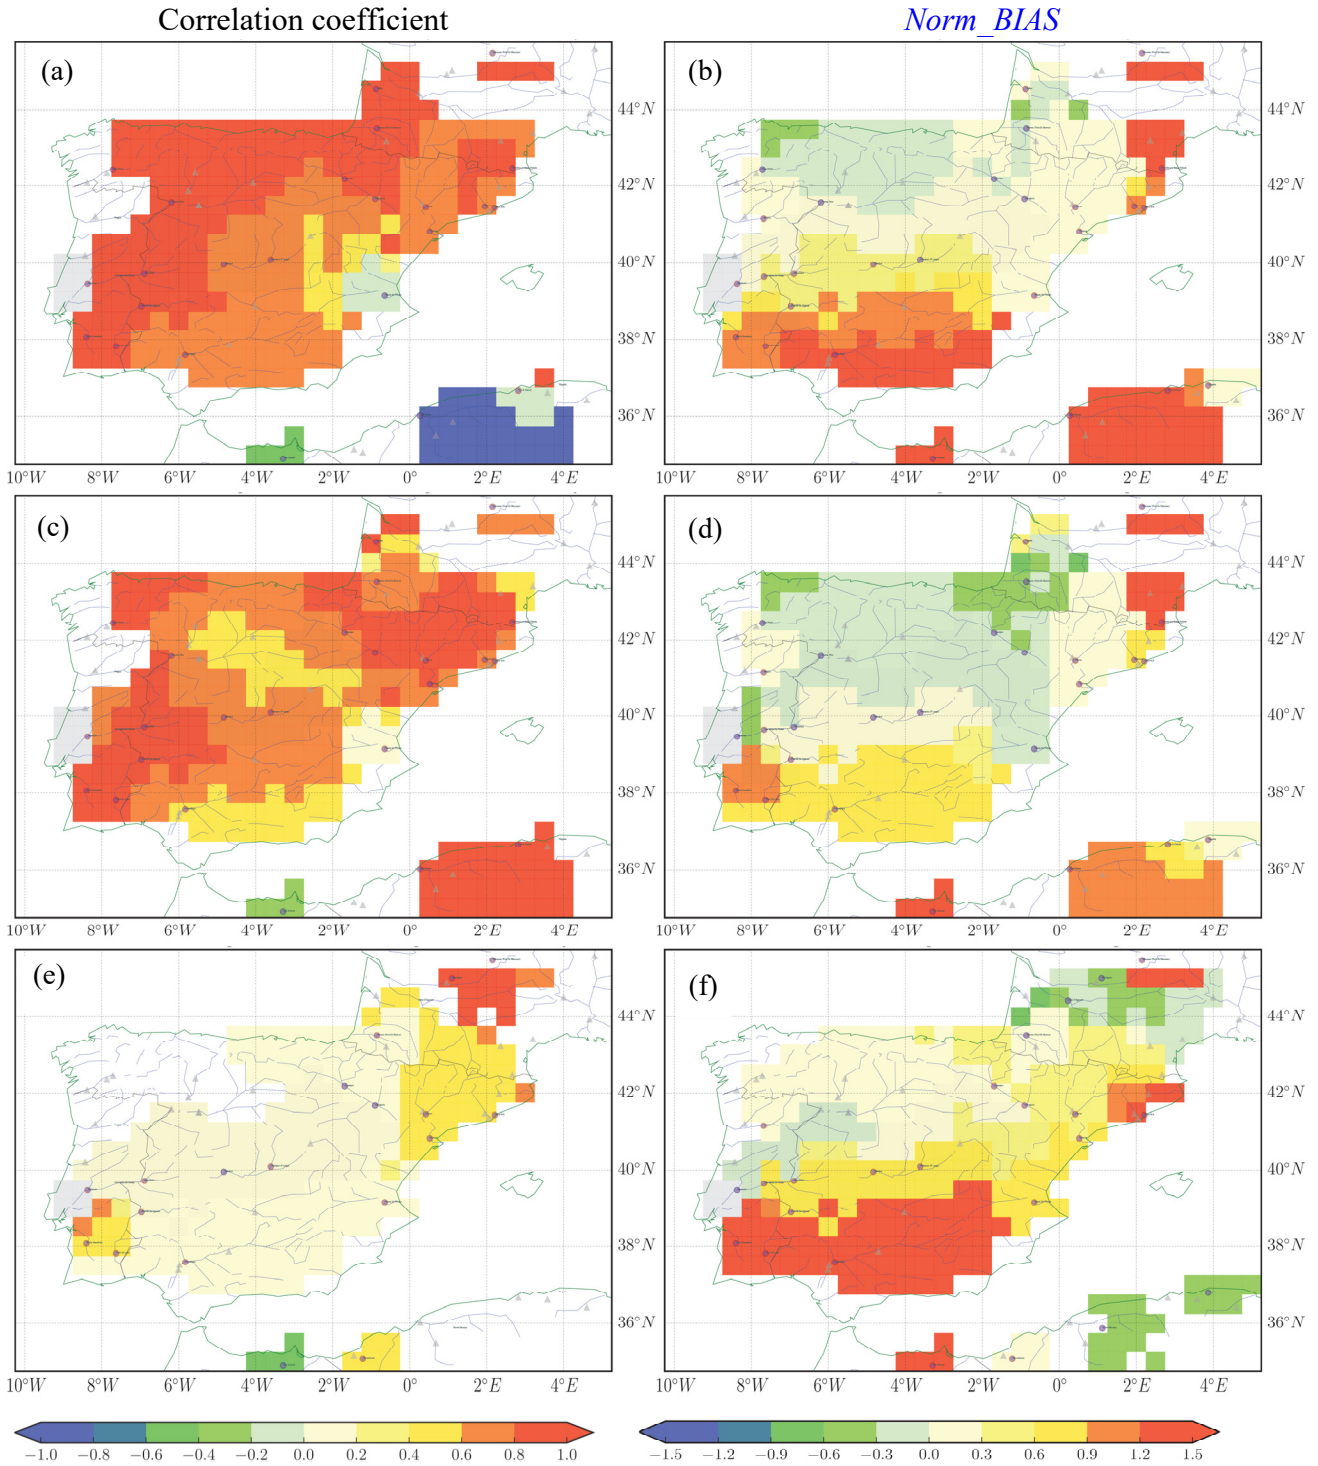

**Figure 5.** The river discharge simulations from 1980 to 1989 using WFDEI\_GPCC (1<sup>st</sup> row), WFDEI\_CRU (2<sup>nd</sup> row) and CRU\_NCEP (3<sup>rd</sup> row) forcing. Left: the correlation coefficient of river discharge between observations and simulations; Right: the *Norm\_BIAS* of simulated river discharge.

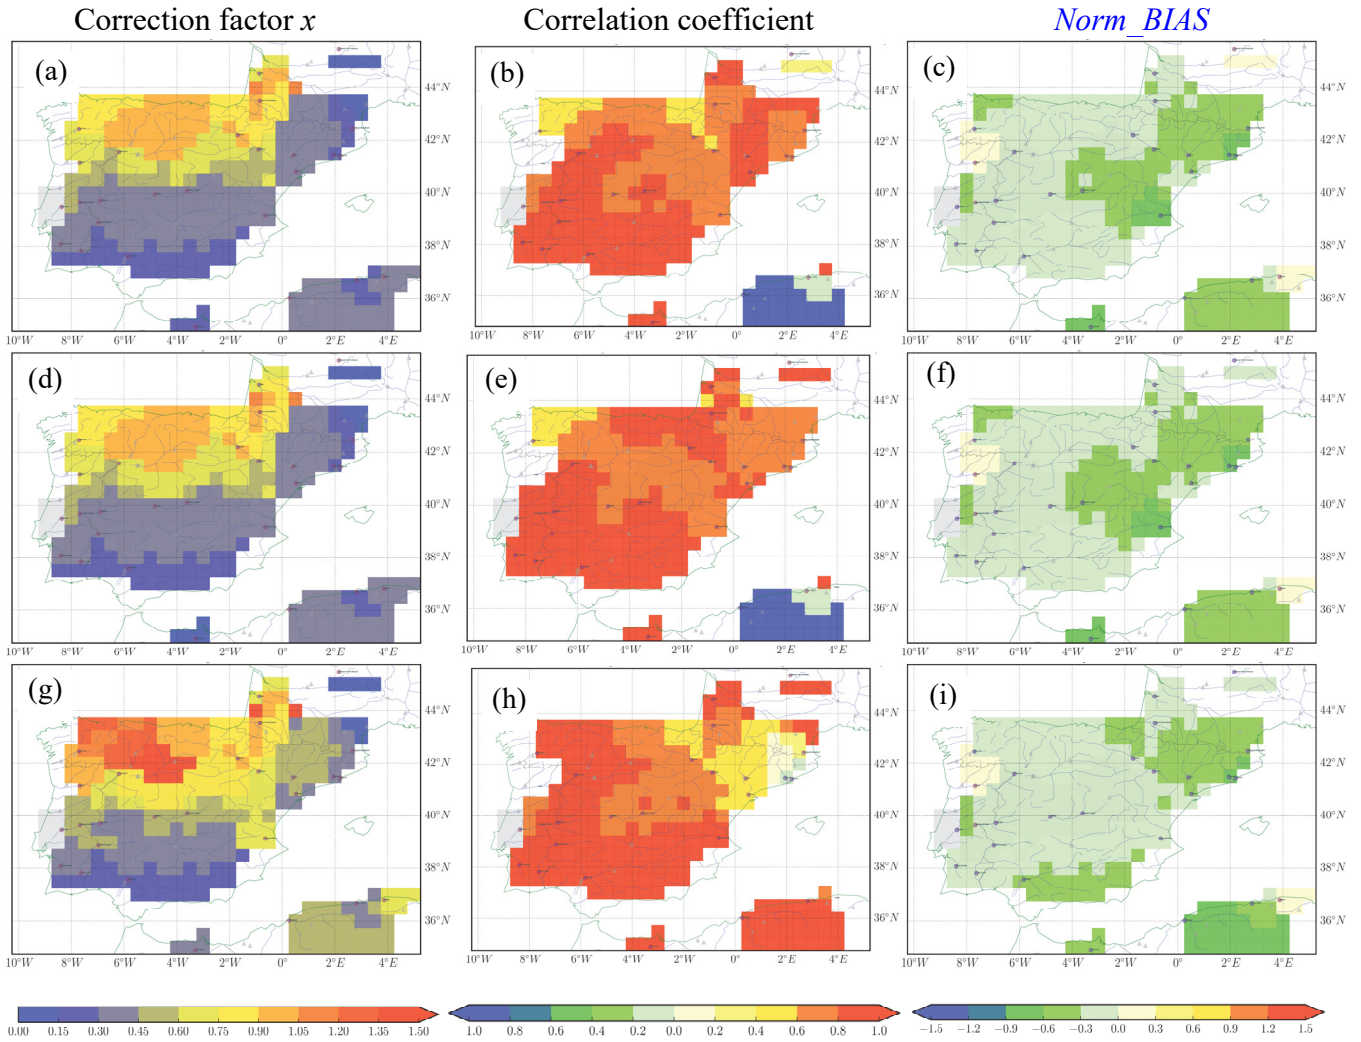

**Figure 6.** The optimization results from 1980 to 1989 using the three methods (1<sup>st</sup> row: Y1SP1; 2<sup>nd</sup> row: Y1SP0; 3<sup>rd</sup> row: Y10C) forced by WFDEI\_GPCC. Left: the optimized correction factor  $x$ ; Middle: the correlation coefficient of river discharge between observations and optimizations; Right: the *Norm\_BIAS* of optimized river discharge.

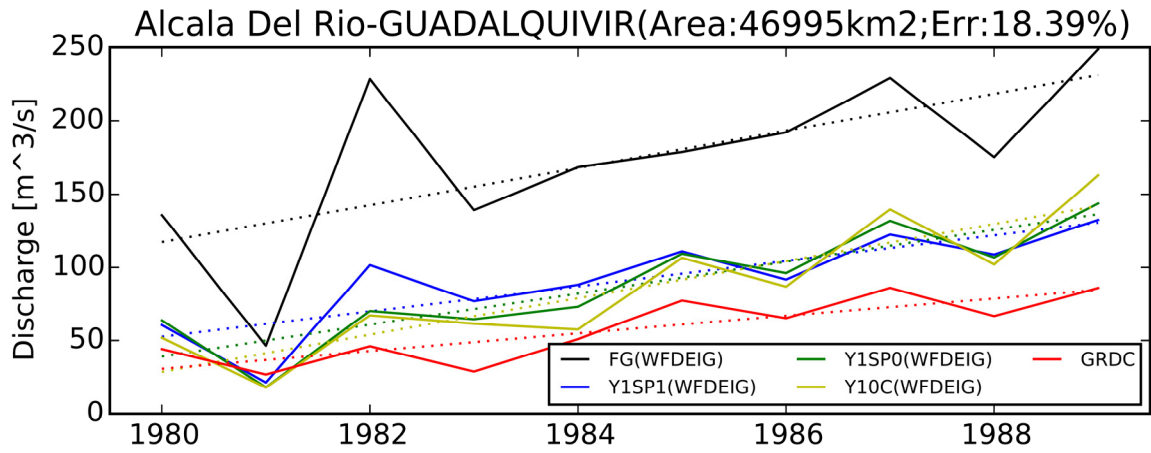

**Figure 7.** The annual cycles of river discharge for ‘First Guess’ (FG) forced by WFDEI-GPCC (black), Y1SP1 (blue), Y1SP0 (green), Y10C (yellow) and GRDC observations (red) over the Alcala Del Rio station (-5.98°W, 37.52°N) on the Guadalquivir river. The dotted lines mean the trend.

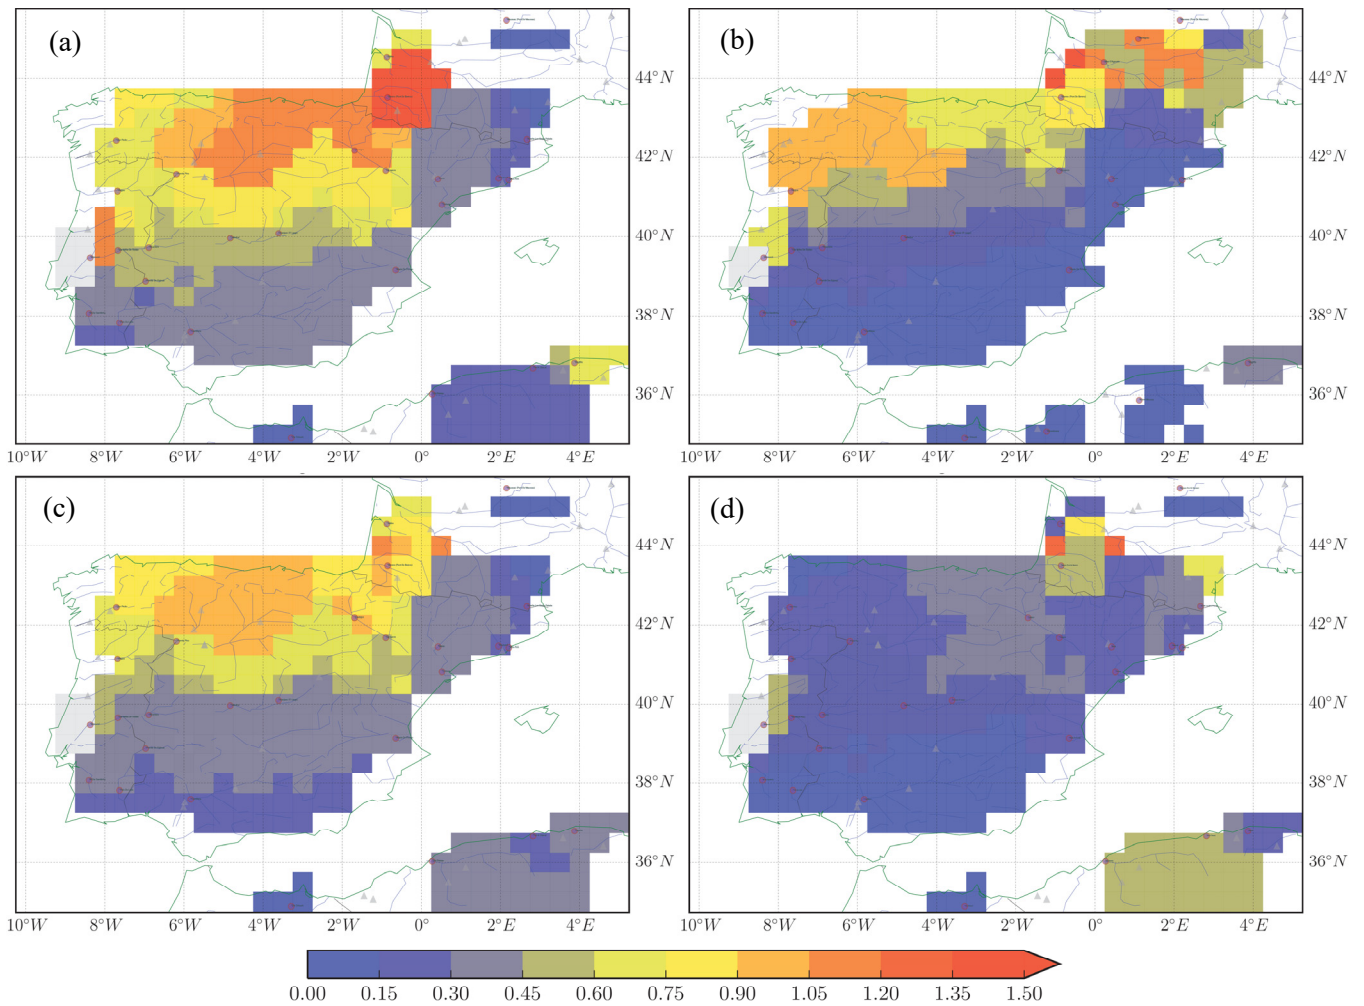

**Figure 8.** The correction factor  $x$  obtained from YISP0 forced by (a) WFDEI\_CRU, (b) CRU\_NCEP, (c) WFDEI\_GPCC, and (d) the ‘Uncertainty’ (defined by Eq. 10) of  $x$  by different forcing. All values are averaged over 1980-1989.

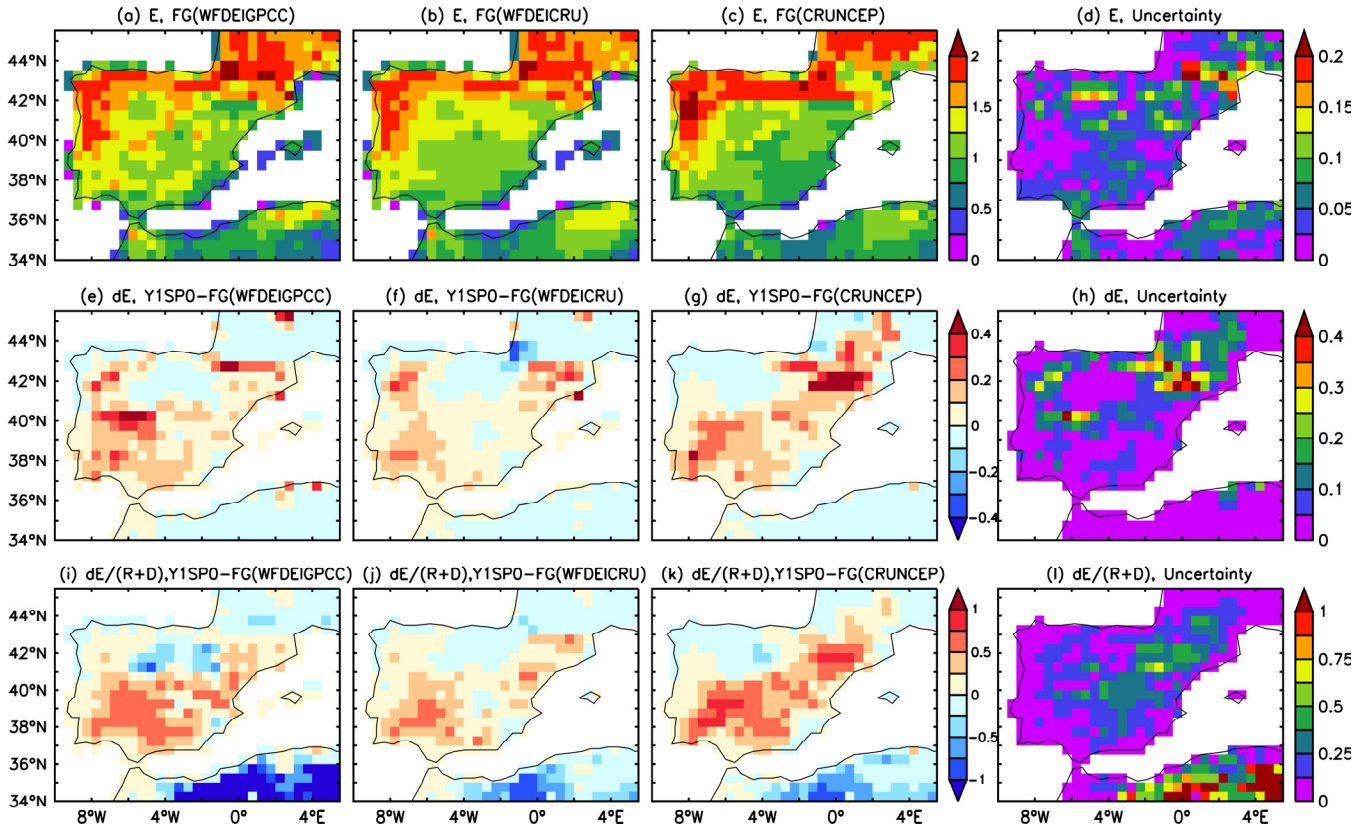

**Figure 9.** The evaporation ( $E$ , in mm/d) before assimilation (1<sup>st</sup> line), change of evaporation ( $dE$ , in mm/d) after and before assimilation (2<sup>nd</sup> line), and the ratio of  $dE$  and runoff + drainage (3<sup>rd</sup> line) for forcing WFDEI-GPCC (1<sup>st</sup> column), WFDEI-CRU (2<sup>nd</sup> column), CRU-NCEP (3<sup>rd</sup> column), and the ‘Uncertainty’ (defined by Eq. 10) in different forcing (4<sup>th</sup> column) averaged from 1980 to 1989.



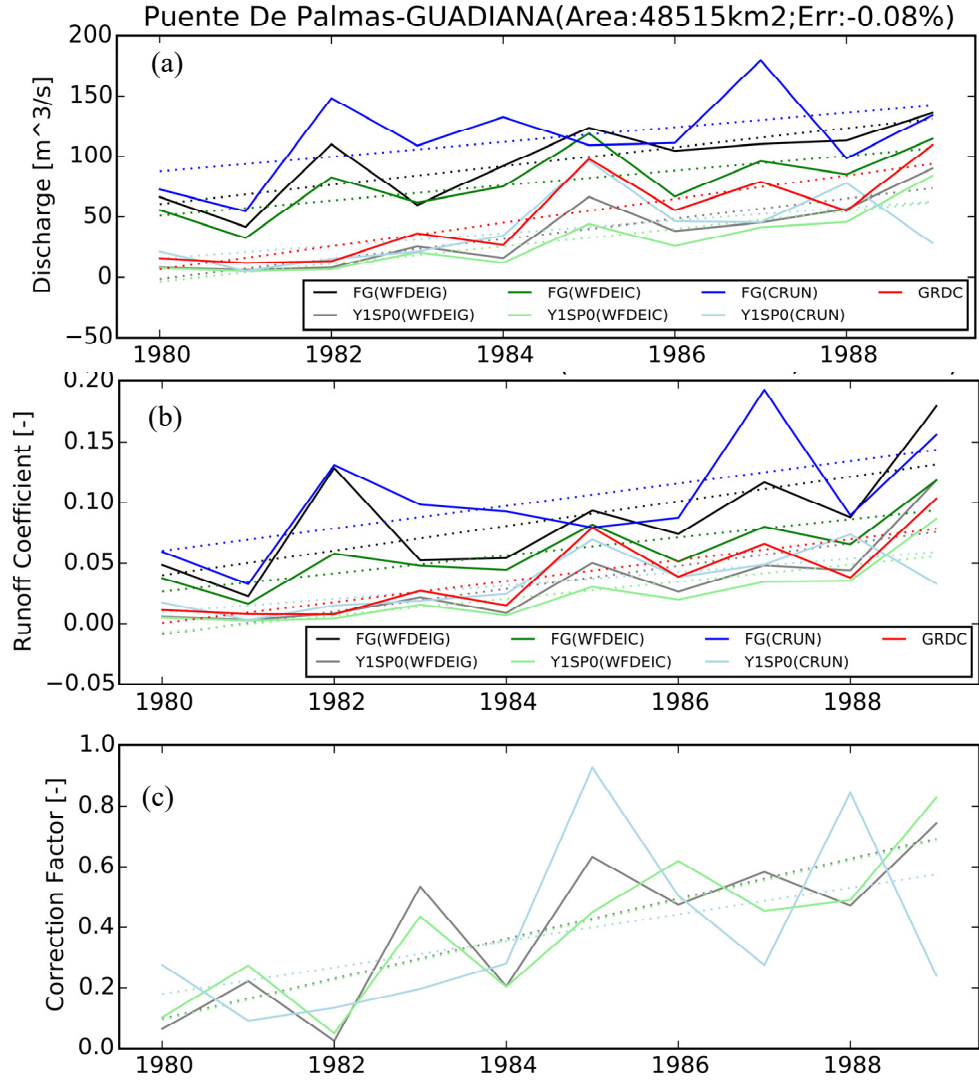

**Figure 10.** The optimization results by different atmospheric forcing (WFDEI-GPCC in black, WFDEI-CRU in green, and CRU-NCEP in blue) over the Puente De Palmas station on Guadiana River (a-d, -6.97°W, 38.88°N; 48515 km<sup>2</sup>) and over the Masia De Pompo station on the Jucar river (e-h, -0.65°W, 39.15°N; 17876 km<sup>2</sup>): (a, d) annual river discharges; (b, e) runoff coefficient; (e, f) optimized correction factor  $x$  for the simulated/assimilated river discharge (First Guess - FG in dark color, Y1SP0 in light color) with respect to GRDC observations (in red) from 1980 to 1989.

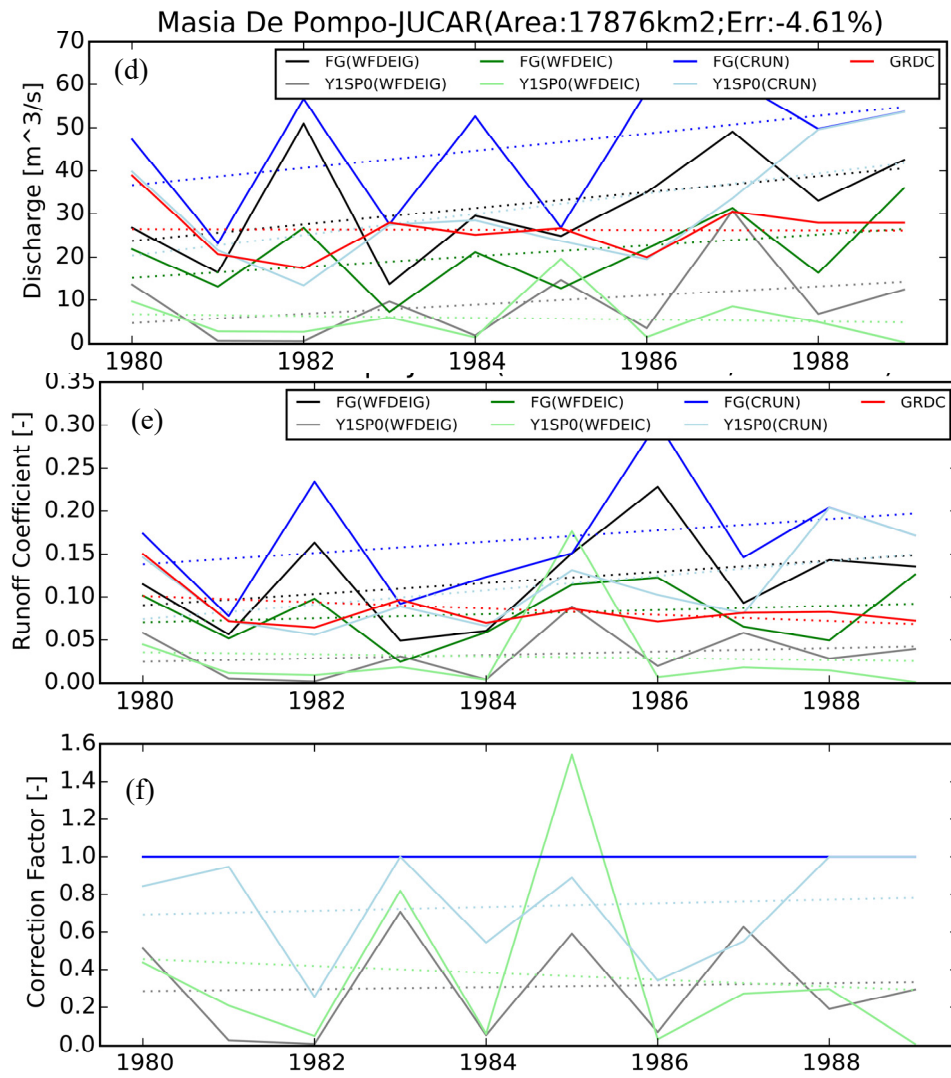

Figure 10. Continued.

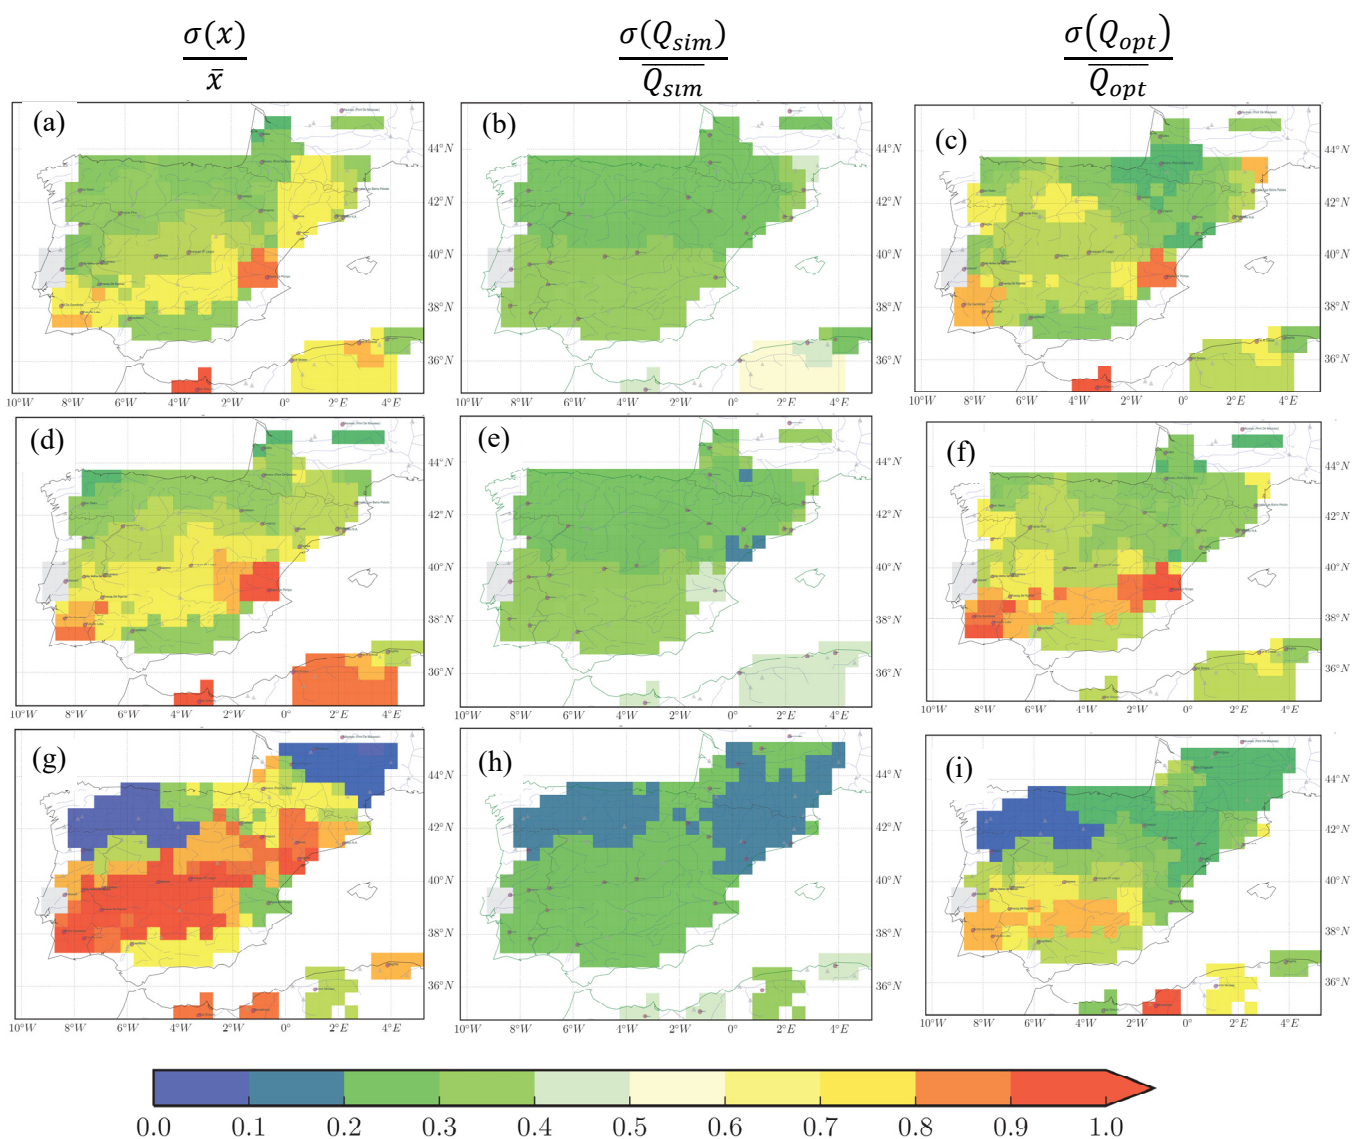

**Figure 11.** The inter-annual variation of correction factor  $x$  ( $\frac{\sigma(x)}{\bar{x}}$ ; a, d, g), simulated river discharge without assimilation ( $\frac{\sigma(Q_{sim})}{Q_{sim}}$ ; b, e, h) and optimized river discharge ( $\frac{\sigma(Q_{opt})}{Q_{opt}}$ ; c, f, i) for Y1SP0\_WFDEIGPCC (1<sup>st</sup> row), Y1SP0\_WFDEICRU (2<sup>nd</sup> row) and Y1SP0\_CRUNCEP (3<sup>rd</sup> row) averaged over 1980-1989.

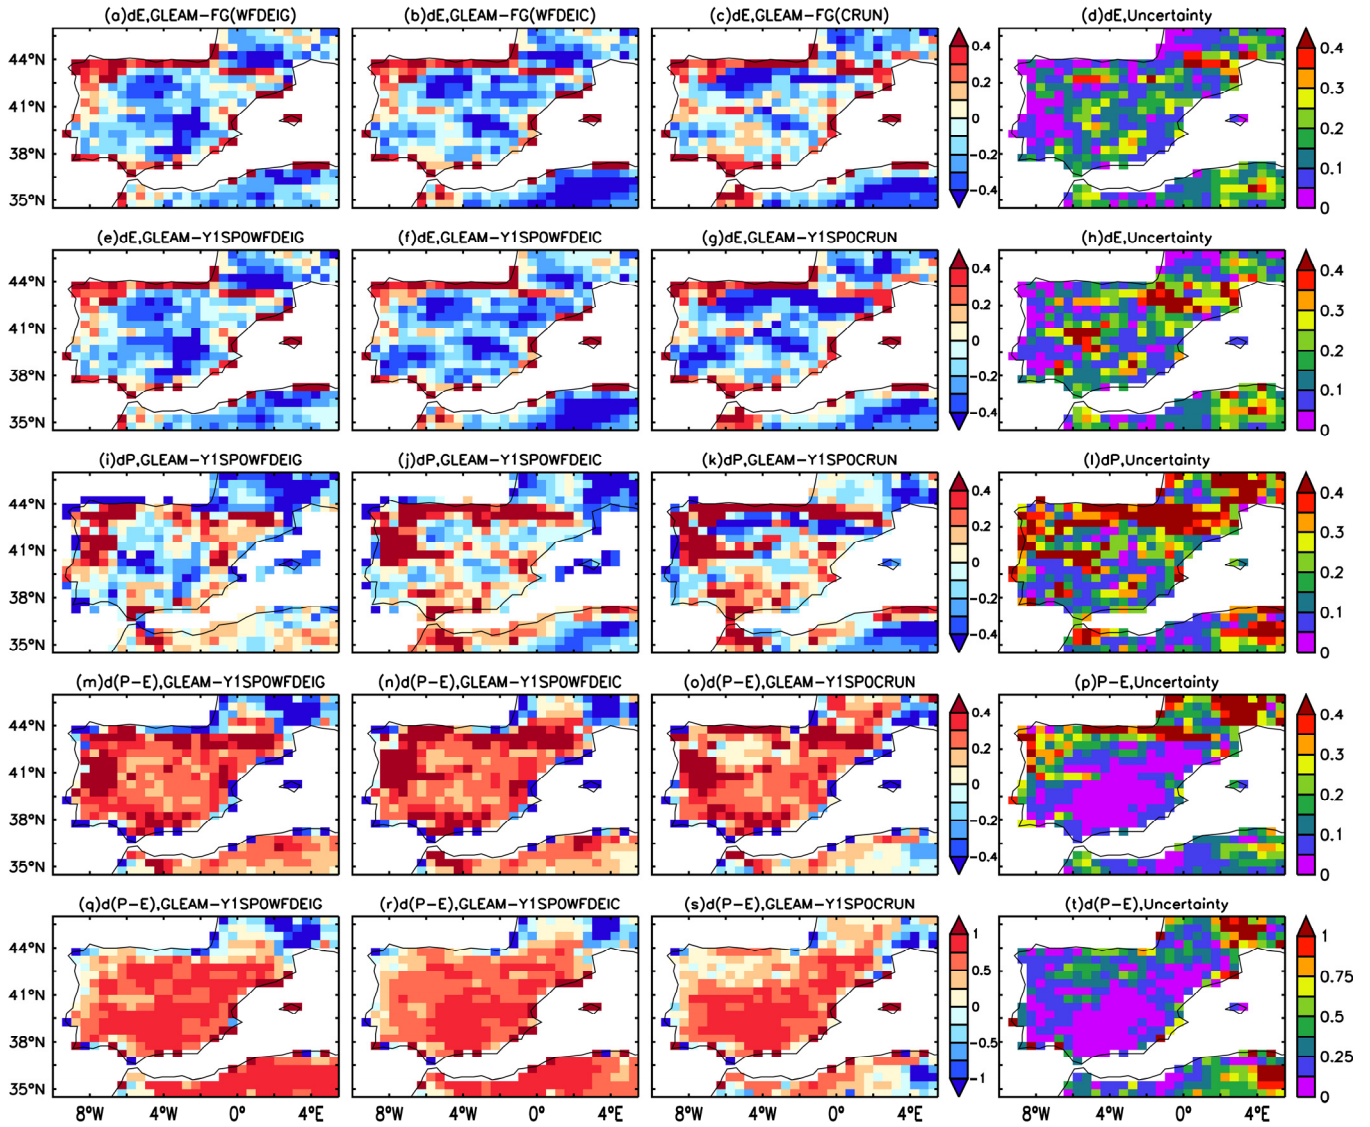

**Figure 12.** Comparison of evaporation ( $E$ , in mm/d, 1<sup>st</sup> line) between GLEAM (v3.1) and FG (First Guess), as well as  $E$  (2<sup>nd</sup> line), precipitation ( $P$ , in mm/d, 3<sup>rd</sup> line),  $P-E$  (in mm/d, 4<sup>th</sup> line) and  $P-E$  (relative value between 0-1, 5<sup>th</sup> line) between GLEAM (v3.1) and assimilated values using different forcing (1<sup>st</sup> column: WFDEI-GPCC; 2<sup>nd</sup> column: WFDEI-CRU; 3<sup>rd</sup> column: CRU-NCEP; 4<sup>th</sup> column: ‘Uncertainty’ (defined by Eq. 10) of using different forcing) averaged from 1980 to 1989.

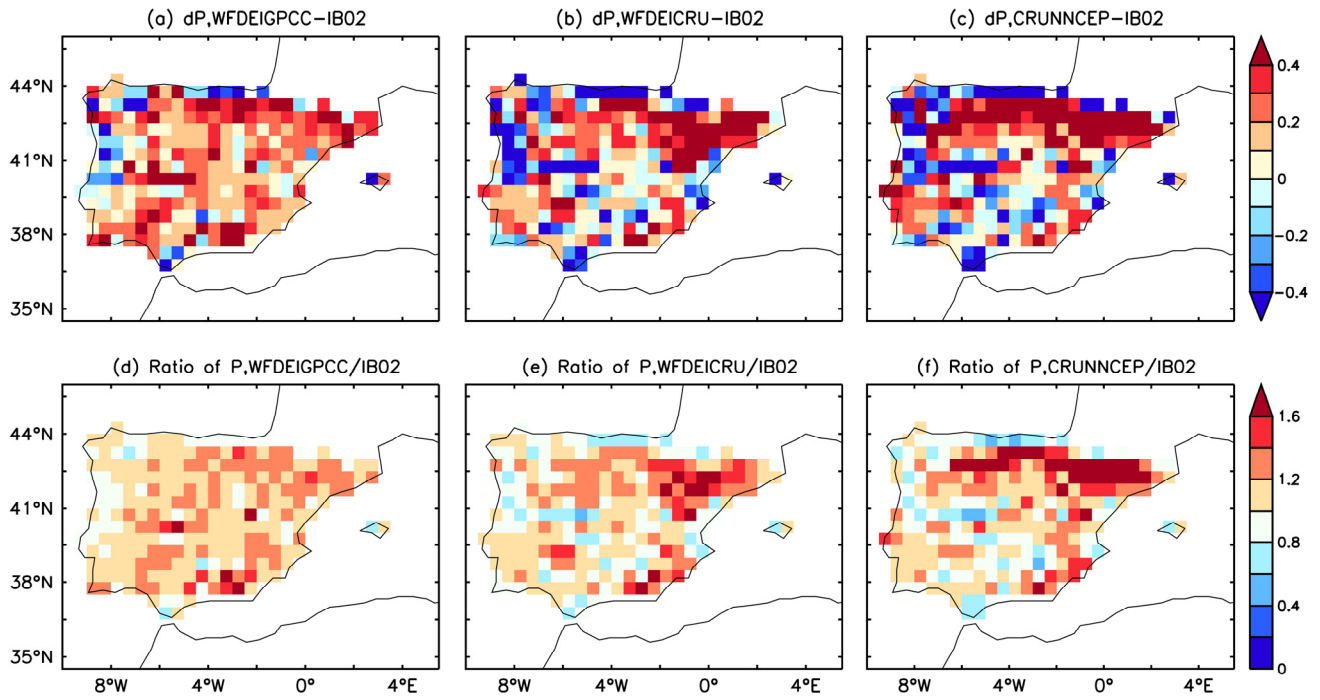

**Figure S1.** Comparison of precipitation ( $P$ , in mm/d) between IB02 and that used in the assimilation (a and d: WFDEI-GPCC; b and e: WFDEI-CRU; c and f: CRUNNCEP) averaged from 1980 to 1989: 1<sup>st</sup> row for difference; 2<sup>nd</sup> row for ratio.
